# Supplementary material for: Jejucarbazoles A–C, carbazole glycosides with indoleamine 2,3-dioxygenase 1 inhibitory activity fromStreptomycessp. KCB15JA151
Source: Royal Society of Chemistry journal article supplement (doi:10.1039/d1ra02895b), 2021-01-01
Supplement: d1ra02895b1.pdf [file d1ra02895b1.pdf]

Supporting information

# Jejucarbazoles A-C, Carbazole Glycosides with Indoleamine 2,3-dioxygenase 1 Inhibitory Activity from *Streptomyces* sp. KCB15JA151

*Gil Soo Kim*<sup>‡ ab</sup>, *Jun-Pil Jang*<sup>‡ a</sup>, *Mincheol Kwon*<sup>ab</sup>, *Tae Hoon Oh*<sup>ac</sup>, *Kyung Taek Heo*<sup>ab</sup>,  
*Byeongsan Lee*<sup>ac</sup>, *Jung-Sook Lee*<sup>d</sup>, *Sung-Kyun Ko*<sup>a</sup>, *Young-Soo Hong*<sup>ab</sup>, *Jong Seog Ahn*<sup>\*ab</sup>,  
and *Jae-Hyuk Jang*<sup>\*ab</sup>

<sup>a</sup> Anticancer Agent Research Center, Korea Research Institute of Bioscience and  
Biotechnology, Cheongju 28116, Korea

<sup>b</sup> Department of Biomolecular Science, KRIBB School of Bioscience, Korea University of  
Science and Technology, Daejeon 34113, Korea

<sup>c</sup> College of Pharmacy, Chungbuk National University, Cheongju, 28160, Korea

<sup>d</sup> Korean Collection for Type Cultures, Korea Research Institute of Bioscience and  
Biotechnology, Jeongeup 56212, Korea

<sup>‡</sup>These authors contributed equally to this work.

## Table of Contents

- Fig. S1.** UPLC-UV spectrum of compound **1** in MeCN-H<sub>2</sub>O containing 0.05% Formic acid
- Fig. S2.** IR spectrum of compound **1**
- Fig. S3.** CD spectrum of compound **1**
- Fig. S4.** HR-ESI-TOF-MS negative spectrum in compound **1**
- Fig. S5.** MS/MS fragmentation spectrum of compound **1** (parent ion, 514.39 [M + H - H<sub>2</sub>O]<sup>+</sup>)
- Fig. S6.** MS/MS fragmentation spectrum of compound **1** (parent ion, 530.60 [M - H]<sup>-</sup>)
- Fig. S7.** <sup>1</sup>H NMR spectrum of compound **1** in Acetone-*d*<sub>6</sub>
- Fig. S8.** <sup>13</sup>C NMR spectrum of compound **1** in Acetone-*d*<sub>6</sub>
- Fig. S9.** COSY NMR spectrum of compound **1** in Acetone-*d*<sub>6</sub>
- Fig. S10.** HSQC-DEPT NMR spectrum of compound **1** in Acetone-*d*<sub>6</sub>
- Fig. S11.** HMBC NMR spectrum of compound **1** in Acetone-*d*<sub>6</sub>
- Fig. S12.** ROESY NMR spectrum of compound **1** in Acetone-*d*<sub>6</sub>
- Fig. S13.** The relative configuration of the sugar unit in compound **1**
- Fig. S14.** LC-MS analysis for thiocarbamate derivatives of the sugar unit in **1**
- Fig. S15.** UPLC-UV spectrum of compound **2** in MeCN-H<sub>2</sub>O containing 0.05% Formic acid
- Fig. S16.** IR spectrum of compound **2**
- Fig. S17.** CD spectrum of compound **2**
- Fig. S18.** HR-ESI-TOF-MS negative spectrum in compound **2**
- Fig. S19.** MS/MS fragmentation spectrum of compound **2** (parent ion, 532.34 [M + H]<sup>+</sup>)
- Fig. S20.** <sup>1</sup>H NMR spectrum of compound **2** in CD<sub>3</sub>OD
- Fig. S21.** <sup>13</sup>C NMR spectrum of compound **2** in CD<sub>3</sub>OD
- Fig. S22.** COSY NMR spectrum of compound **2** in CD<sub>3</sub>OD
- Fig. S23.** HSQC-DEPT NMR spectrum of compound **2** in CD<sub>3</sub>OD
- Fig. S24.** HMBC NMR spectrum of compound **2** in CD<sub>3</sub>OD
- Fig. S25.** ROESY NMR spectrum of compound **2** in CD<sub>3</sub>OD
- Fig. S26.** UPLC-UV spectrum of compound **3** in MeCN-H<sub>2</sub>O containing 0.05% Formic acid
- Fig. S27.** IR spectrum of compound **3**
- Fig. S28.** HR-ESI-TOF-MS positive spectrum in compound **3**
- Fig. S29.** HR-ESI-TOF-MS negative spectrum in compound **3**
- Fig. S30.** MS/MS fragmentation spectrum of compound **3** (parent ion, 512.56 [M - H]<sup>-</sup>)
- Fig. S31.** <sup>1</sup>H NMR spectrum of compound **3** in CD<sub>3</sub>OD

**Fig. S32.**  $^{13}\text{C}$  NMR spectrum of compound **3** in  $\text{CD}_3\text{OD}$

**Fig. S33.** COSY NMR spectrum of compound **3** in  $\text{CD}_3\text{OD}$

**Fig. S34.** HSQC-DEPT NMR spectrum of compound **3** in  $\text{CD}_3\text{OD}$

**Fig. S35.** HMBC NMR spectrum of compound **3** in  $\text{CD}_3\text{OD}$

**Fig. S36.** ROESY NMR spectrum of compound **3** in  $\text{CD}_3\text{OD}$

**Fig. S37.** Chemical structures of neocarazostains and carquinostatins

**Fig. S38.** Comparison of the putative jejucarbazole biosynthetic gene cluster in *Streptomyces* sp. KCB15JA151 with neocarazostatin and carquinostatin gene clusters

**Fig. S39.** IDO1 inhibition rate of jejucarbazoles A-C

**Table S1.** Predicted functions and homologues in the putative jejucarbazole biosynthetic gene cluster

**Table S2.** Docking scores of compound **1-3** against the holo-IDO1 and apo-IDO1

**Fig. S40.** Molecular-docking analysis of compound **1** with the apo-IDO1 enzyme

**Fig. S41.** Molecular-docking analysis of compound **2** with the apo-IDO1 enzyme

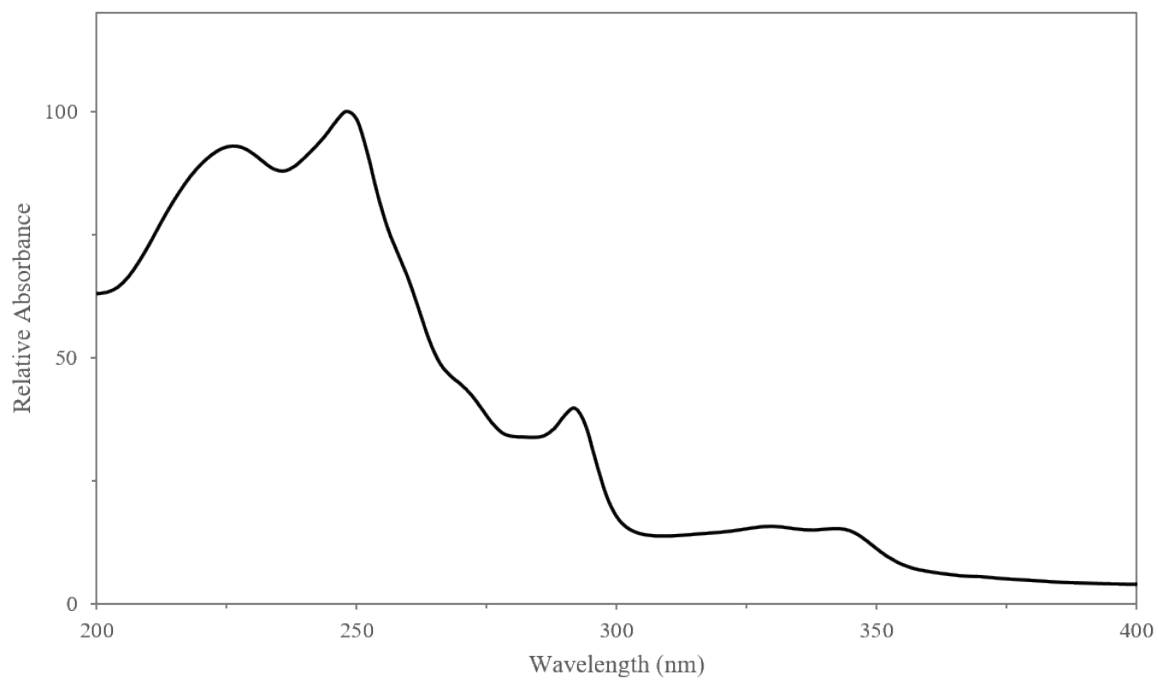

**Fig. S1.** UPLC-UV spectrum of compound **1** in MeCN-H<sub>2</sub>O containing 0.05% Formic acid

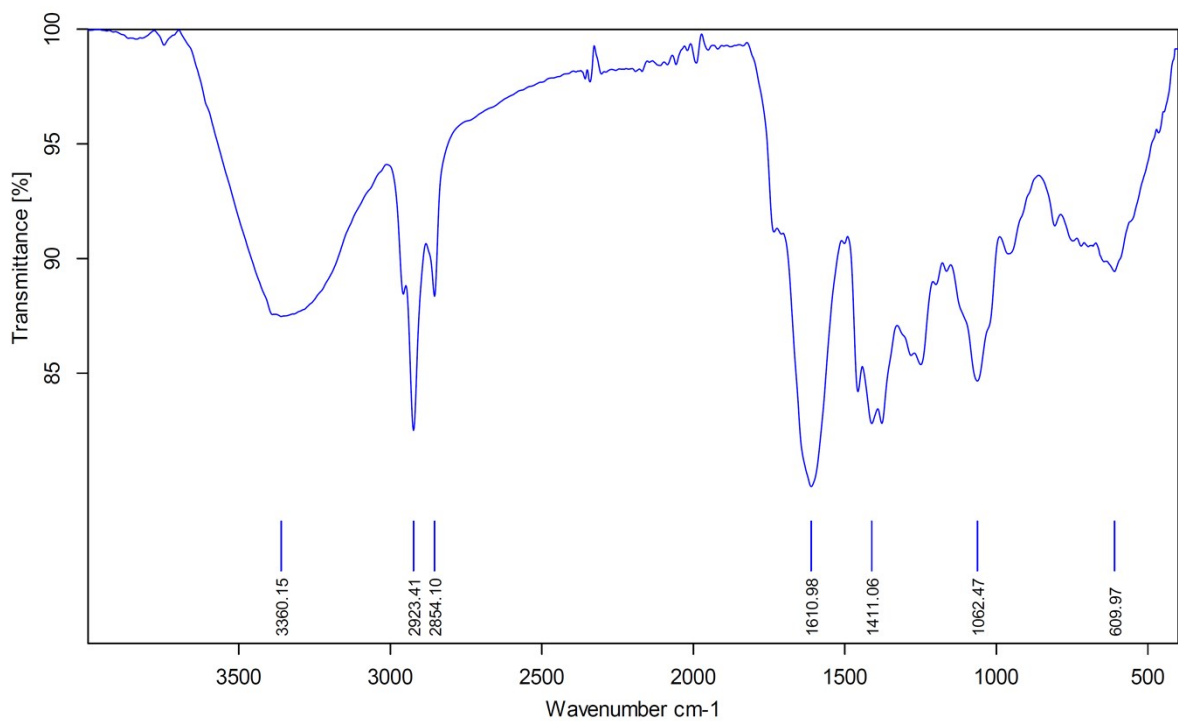

**Fig. S2.** IR spectrum of compound **1**

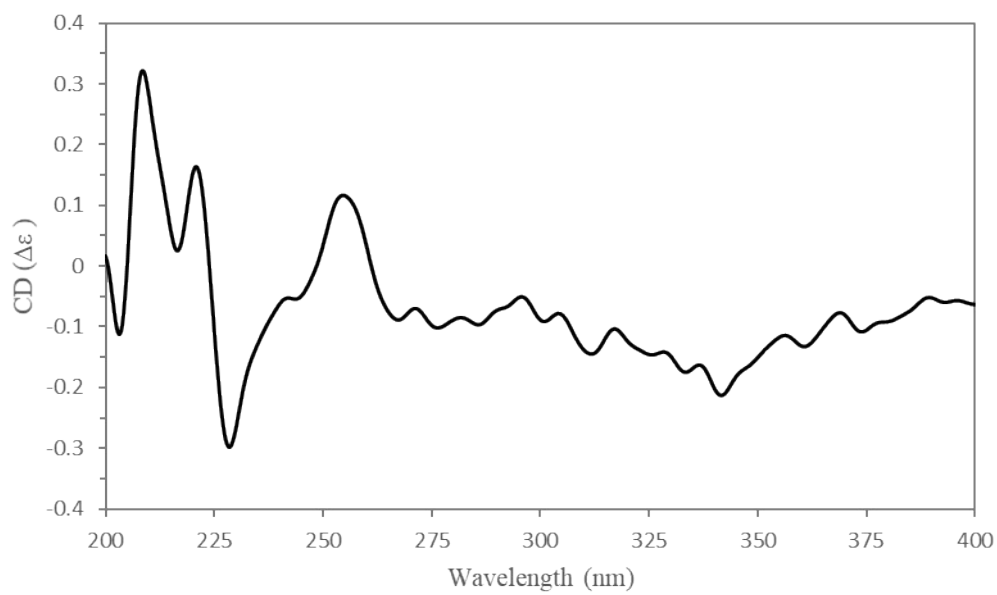

**Fig. S3.** CD spectrum of compound **1**

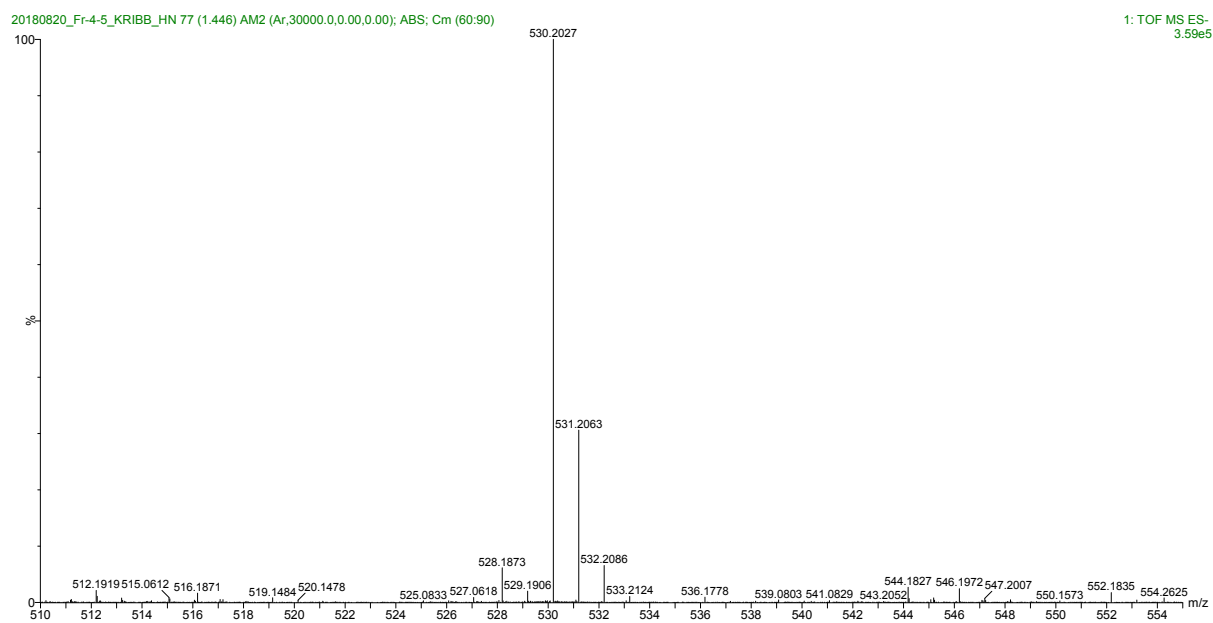

**Fig. S4.** HR-ESI-TOF-MS negative spectrum in compound **1**

KKS\_6E#1356-1439 RT: 10.98-11.69 AV: 4 NL: 1.77E5  
T: ITMS + c ESI d Full ms2 514.39@cid35.00 [130.00-1040.00]

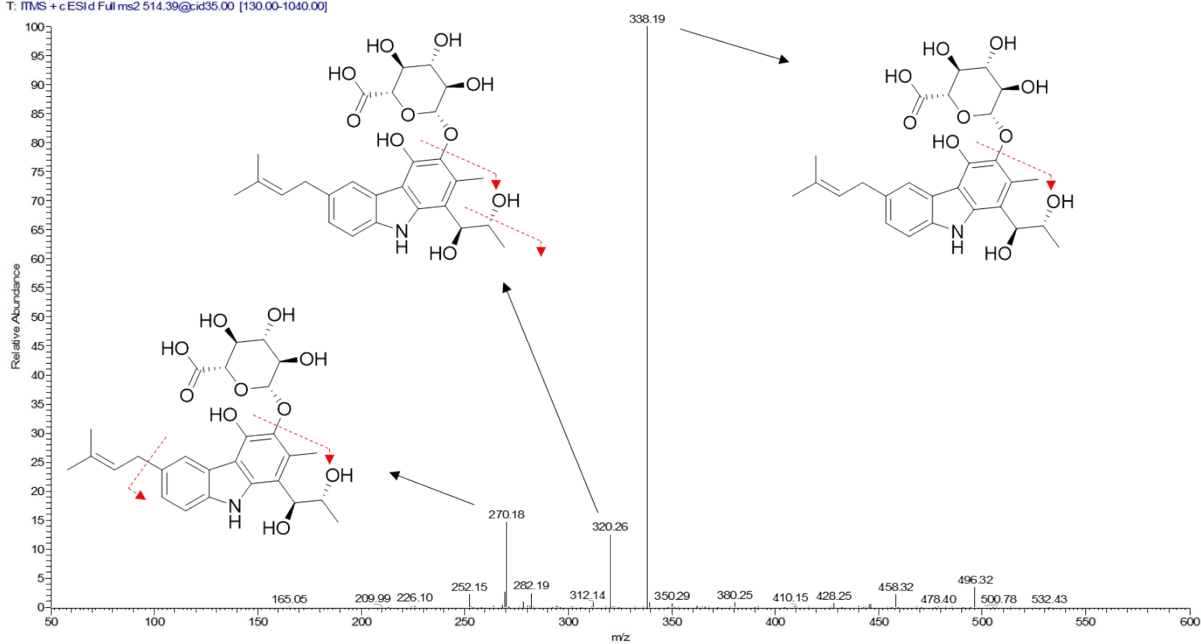

**Fig. S5.** MS/MS fragmentation spectrum of compound 1 (parent ion, 514.39 [M + H - H<sub>2</sub>O]<sup>+</sup>)

KKS\_6E#1365 RT: 11.06 AV: 1 NL: 7.00E4  
F: ITMS - c ESI d Full ms2 530.60@cid35.00 [135.00-1075.00]

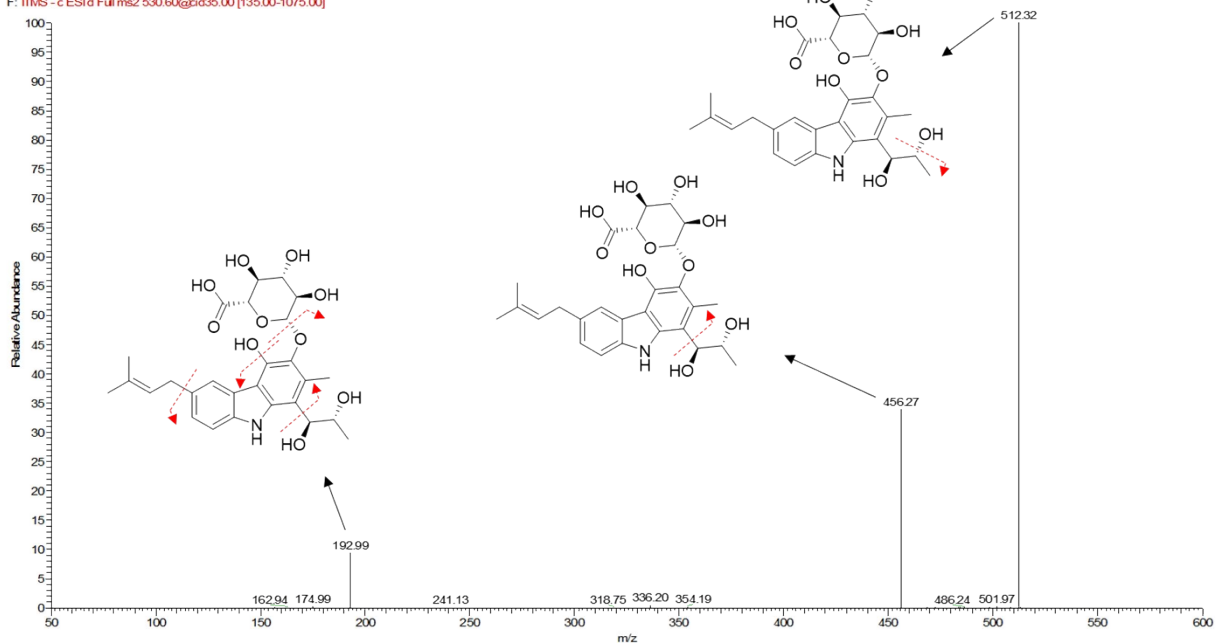

**Fig. S6.** MS/MS fragmentation spectrum of compound 1 (parent ion, 530.60 [M - H]<sup>-</sup>)

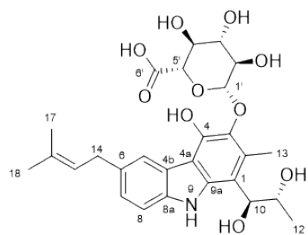

Jejucarbazole A (1)

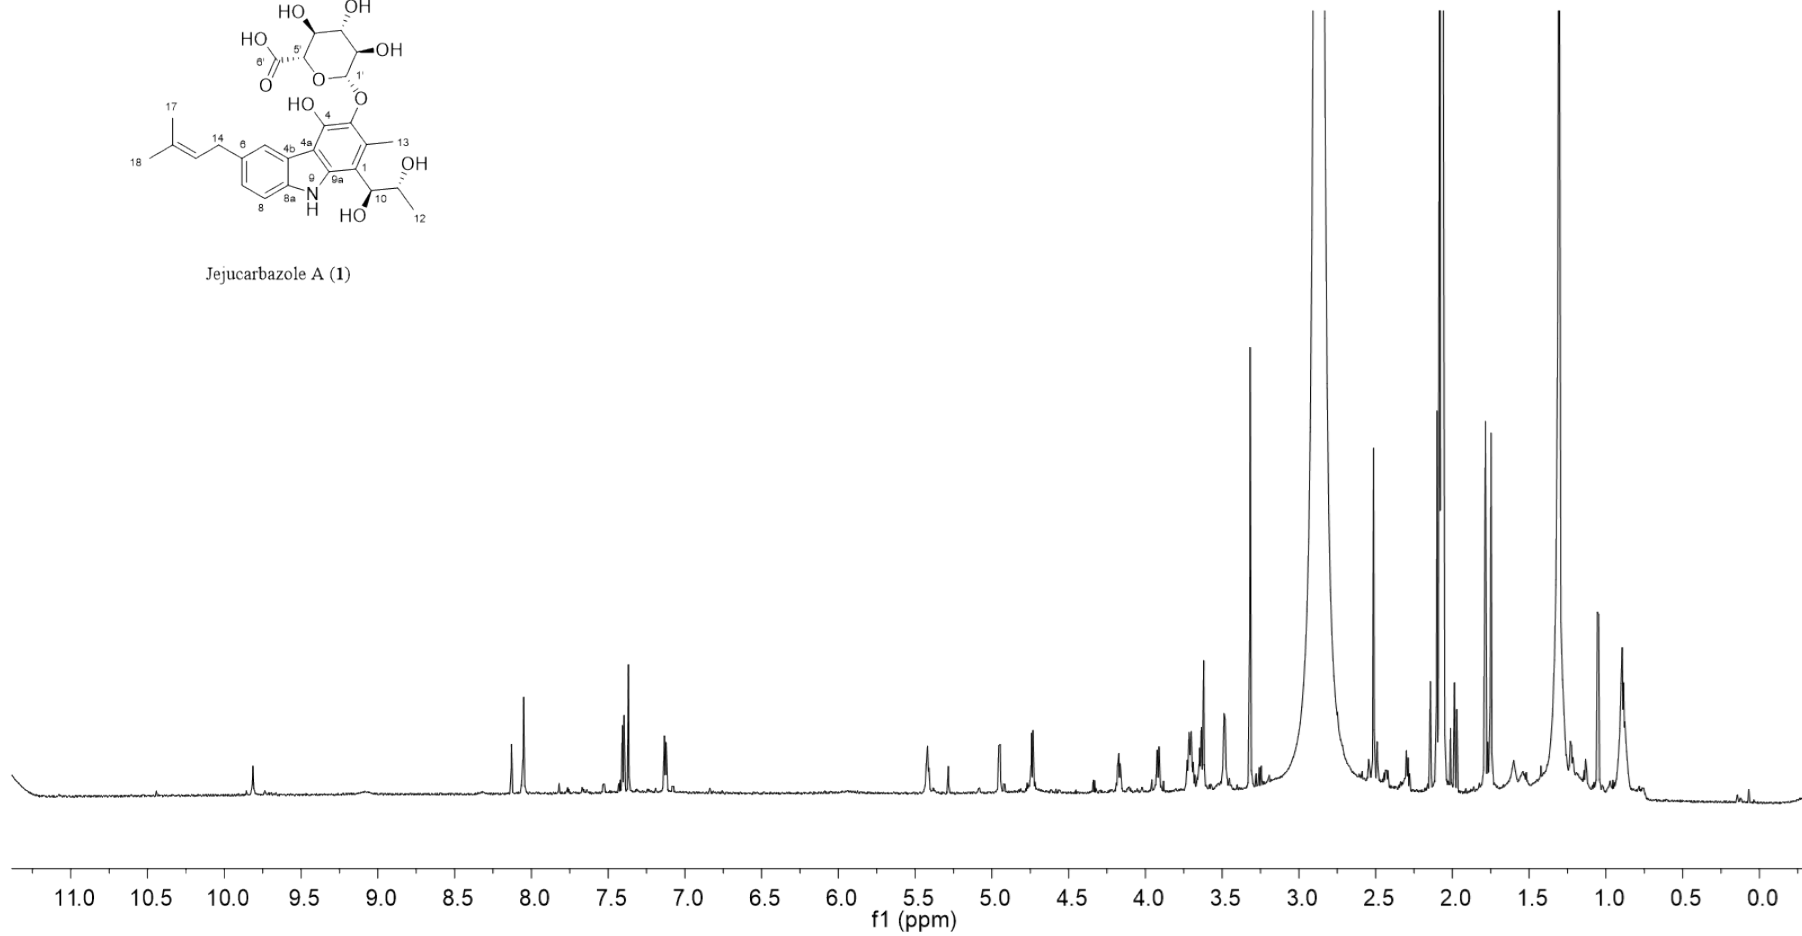

**Fig. S7.** <sup>1</sup>H NMR spectrum of compound **1** in Acetone-*d*<sub>6</sub>

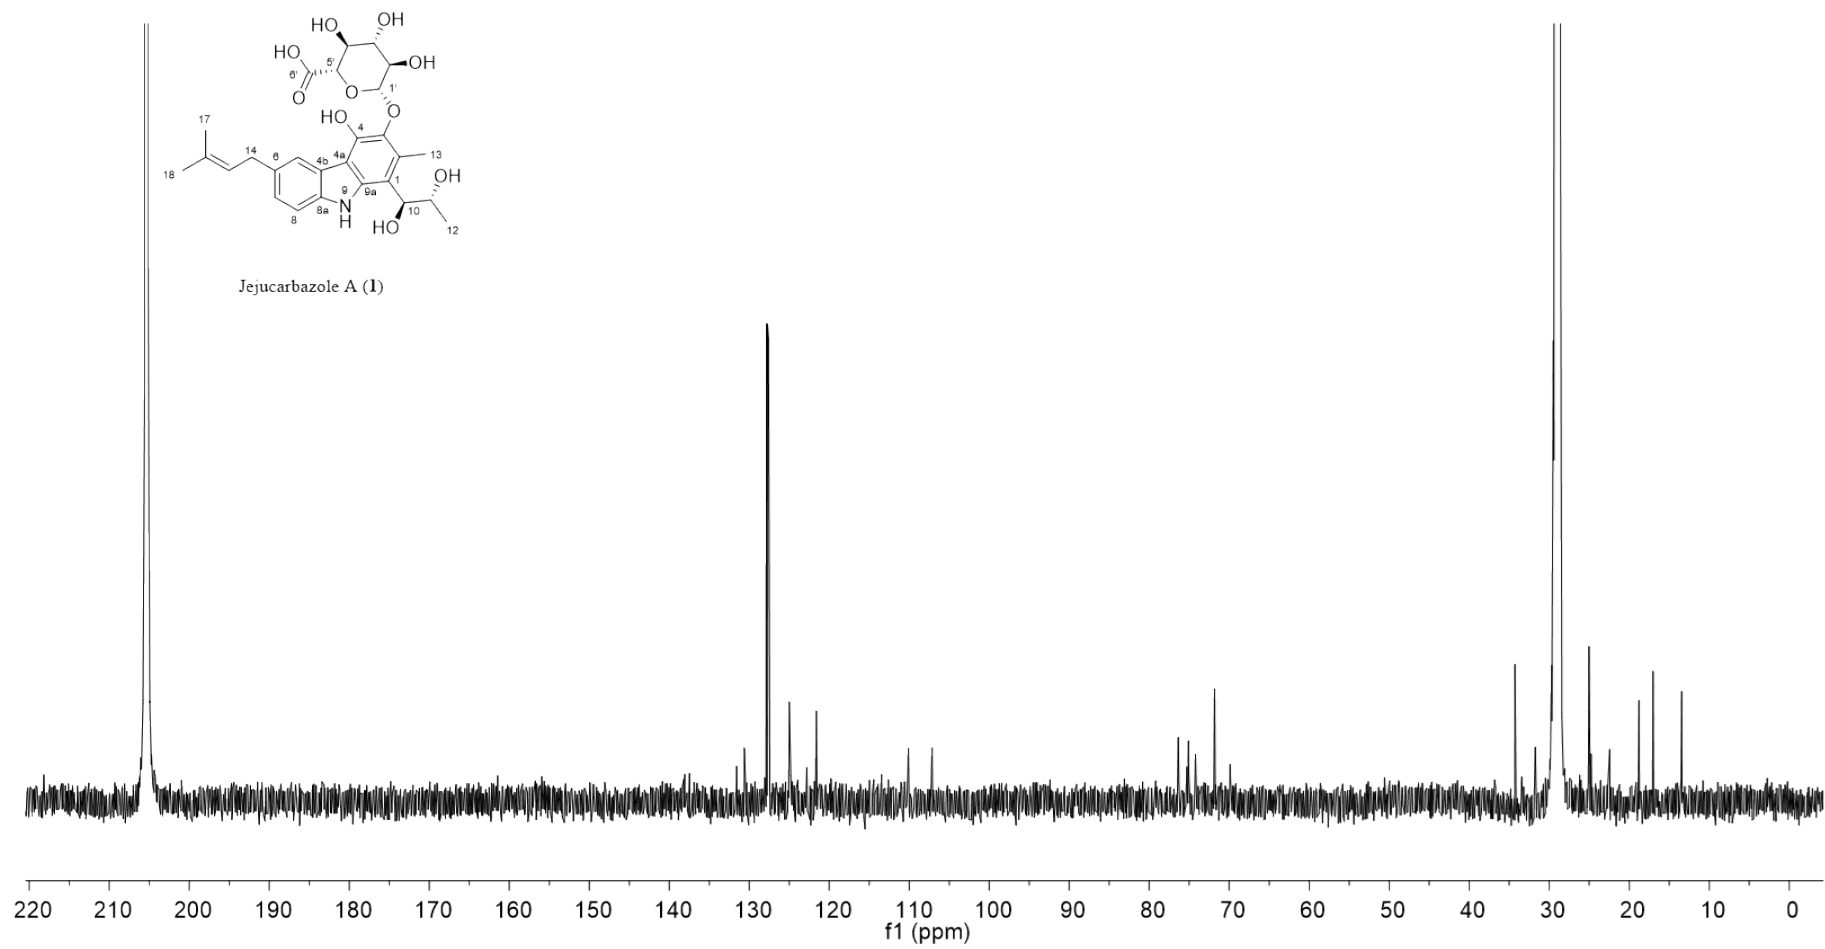

**Fig. S8.**  $^{13}\text{C}$  NMR spectrum of compound **1** in Acetone- $d_6$



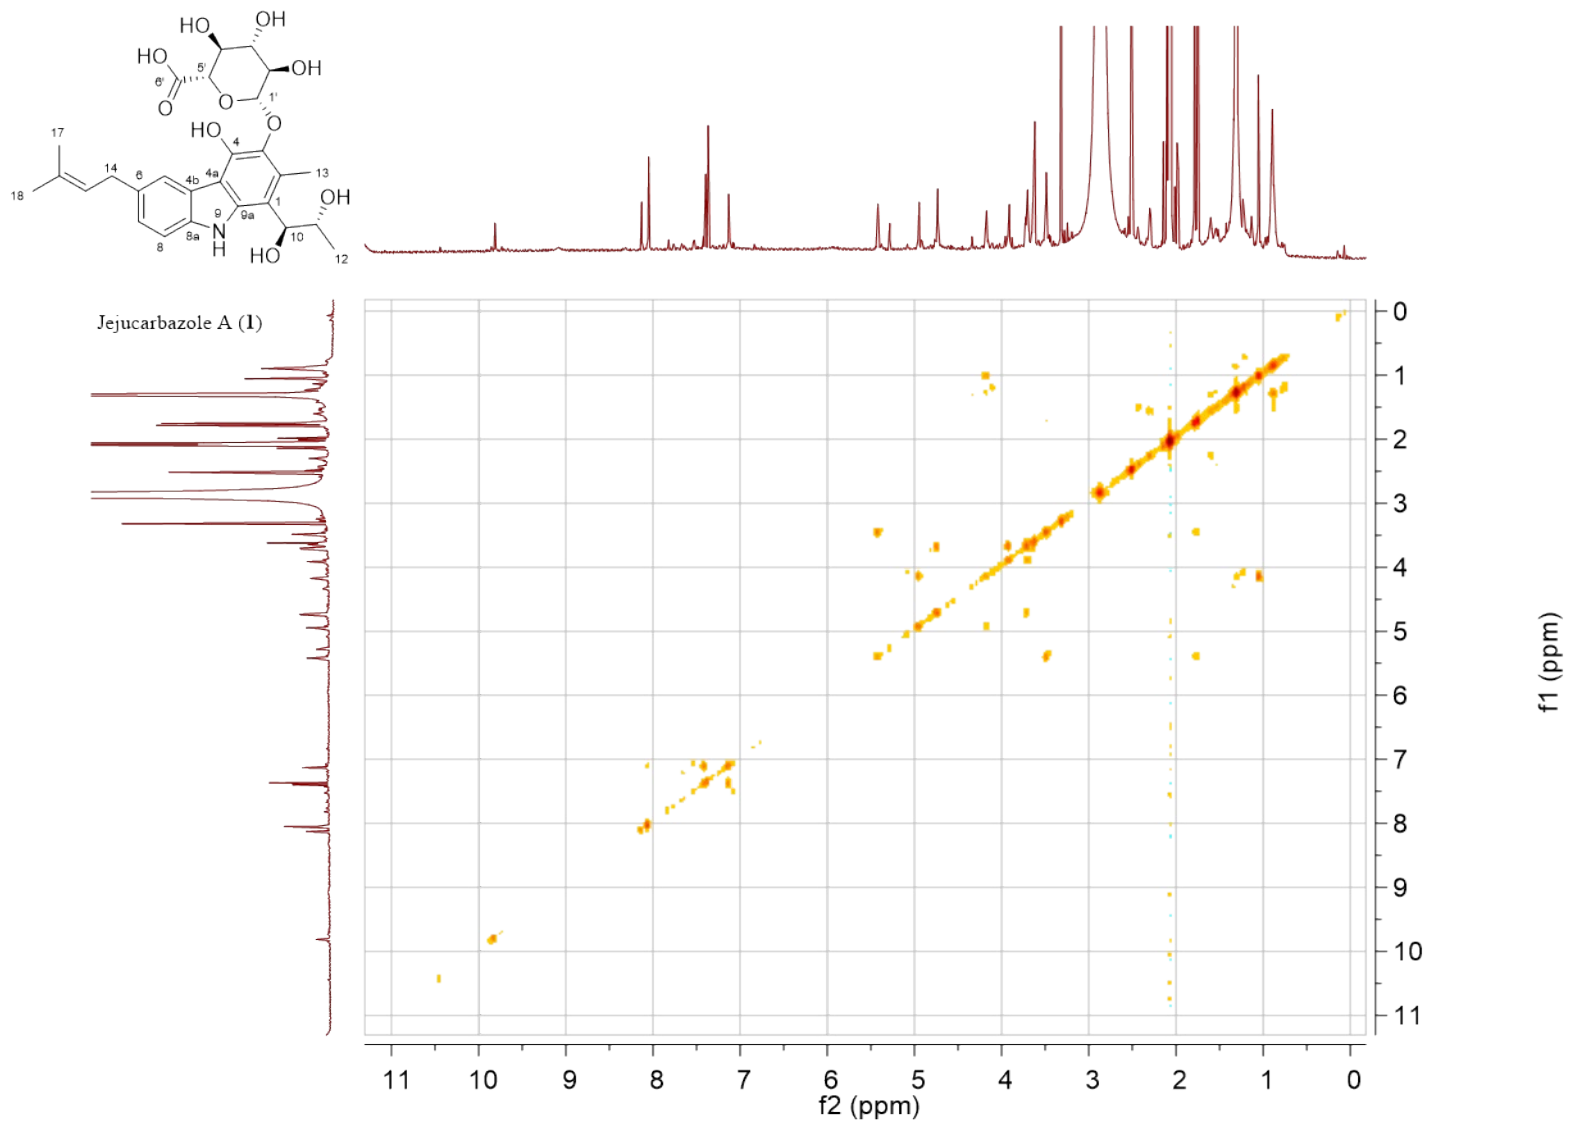

**Fig. S9.** COSY NMR spectrum of compound **1** in Acetone- $d_6$

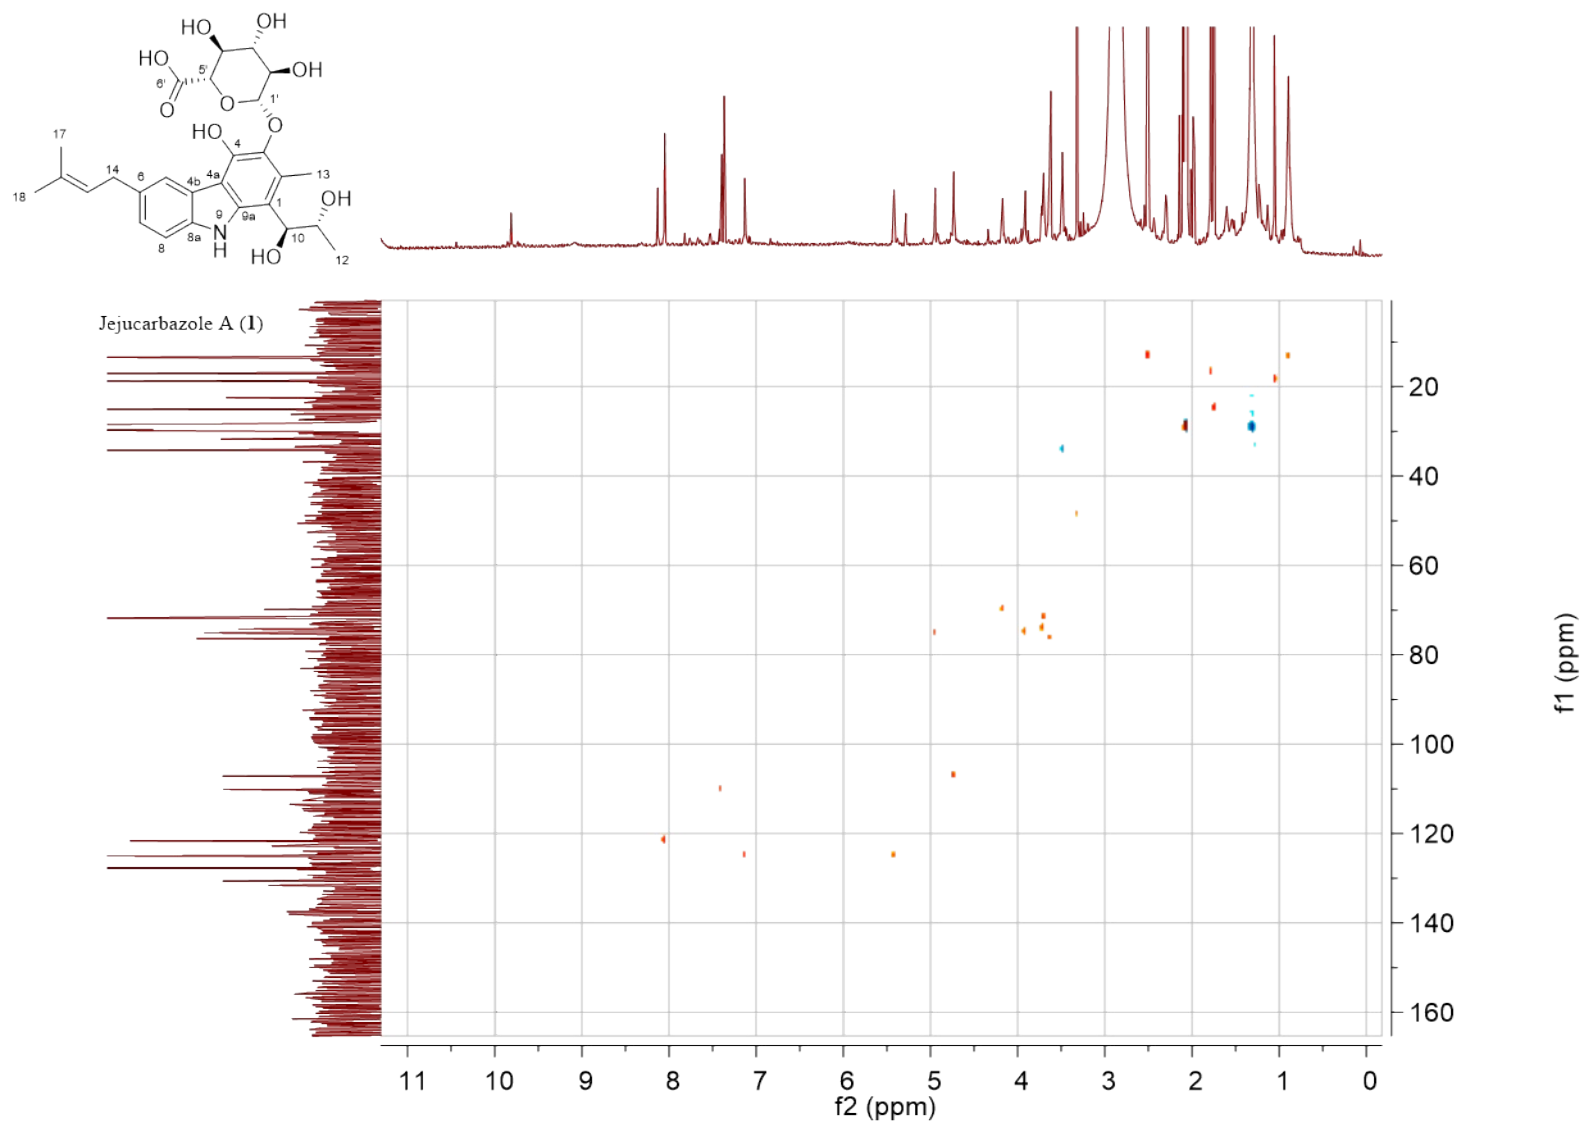

**Fig. S10.** HSQC-DEPT NMR spectrum of compound **1** in Acetone- $d_6$

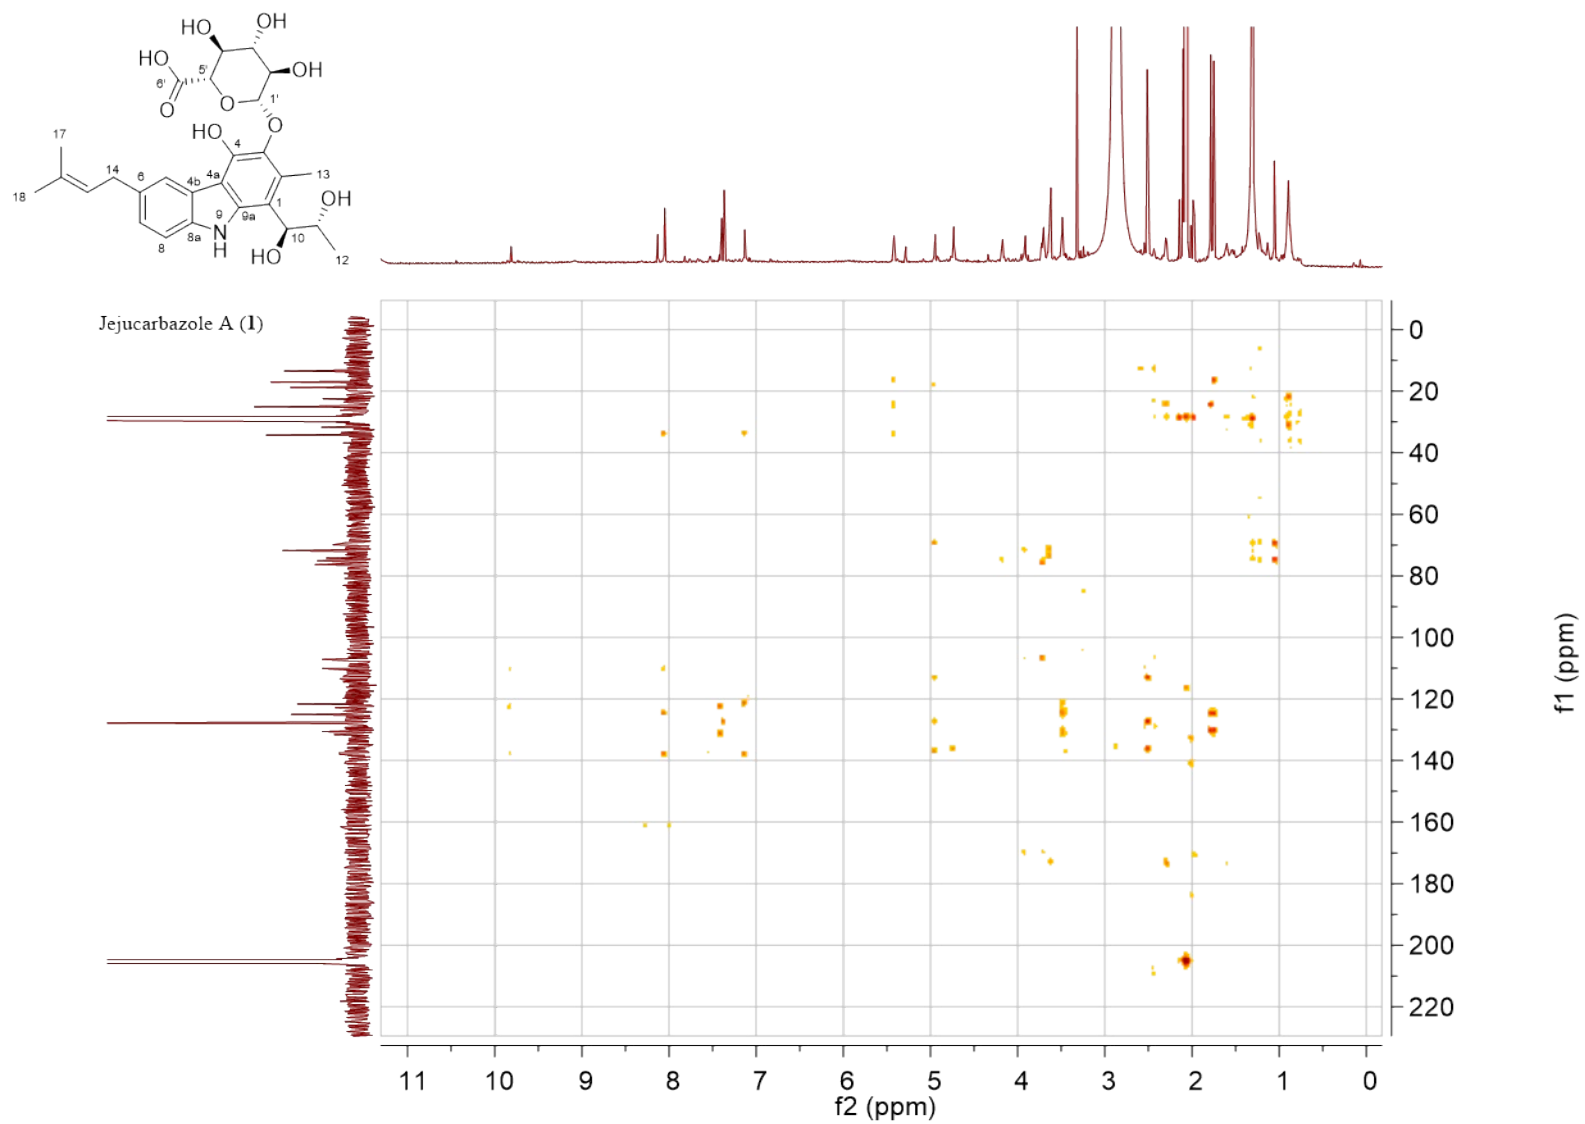

**Fig. S11.** HMBC NMR spectrum of compound **1** in Acetone- $d_6$

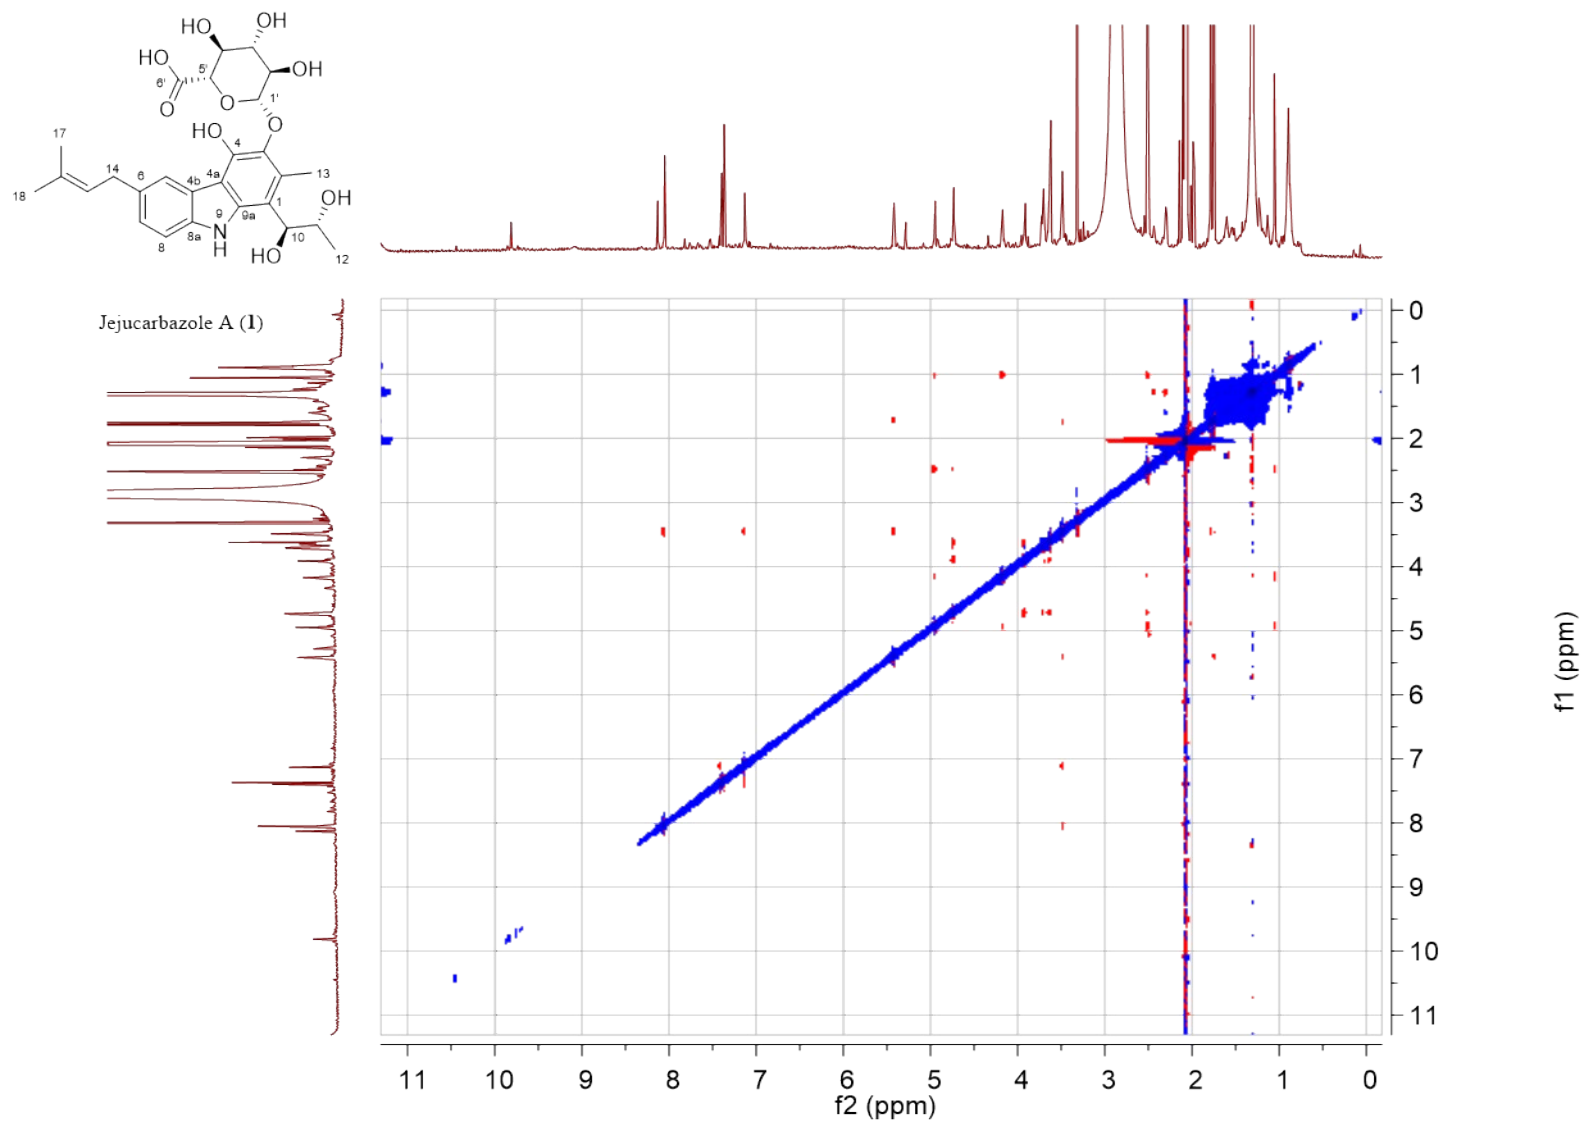

**Fig. S12.** ROESY NMR spectrum of compound **1** in Acetone- $d_6$

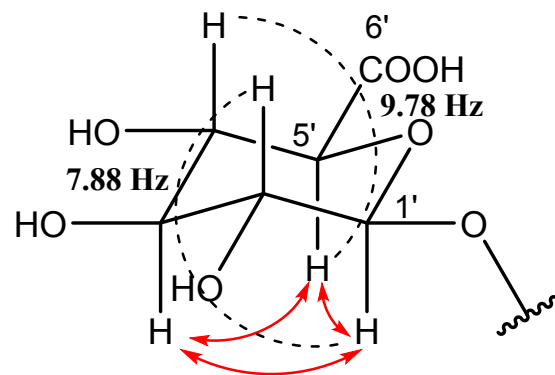

 ROESY       Coupling constant

**Fig. S13.** The relative configuration of the sugar unit in compound **1**

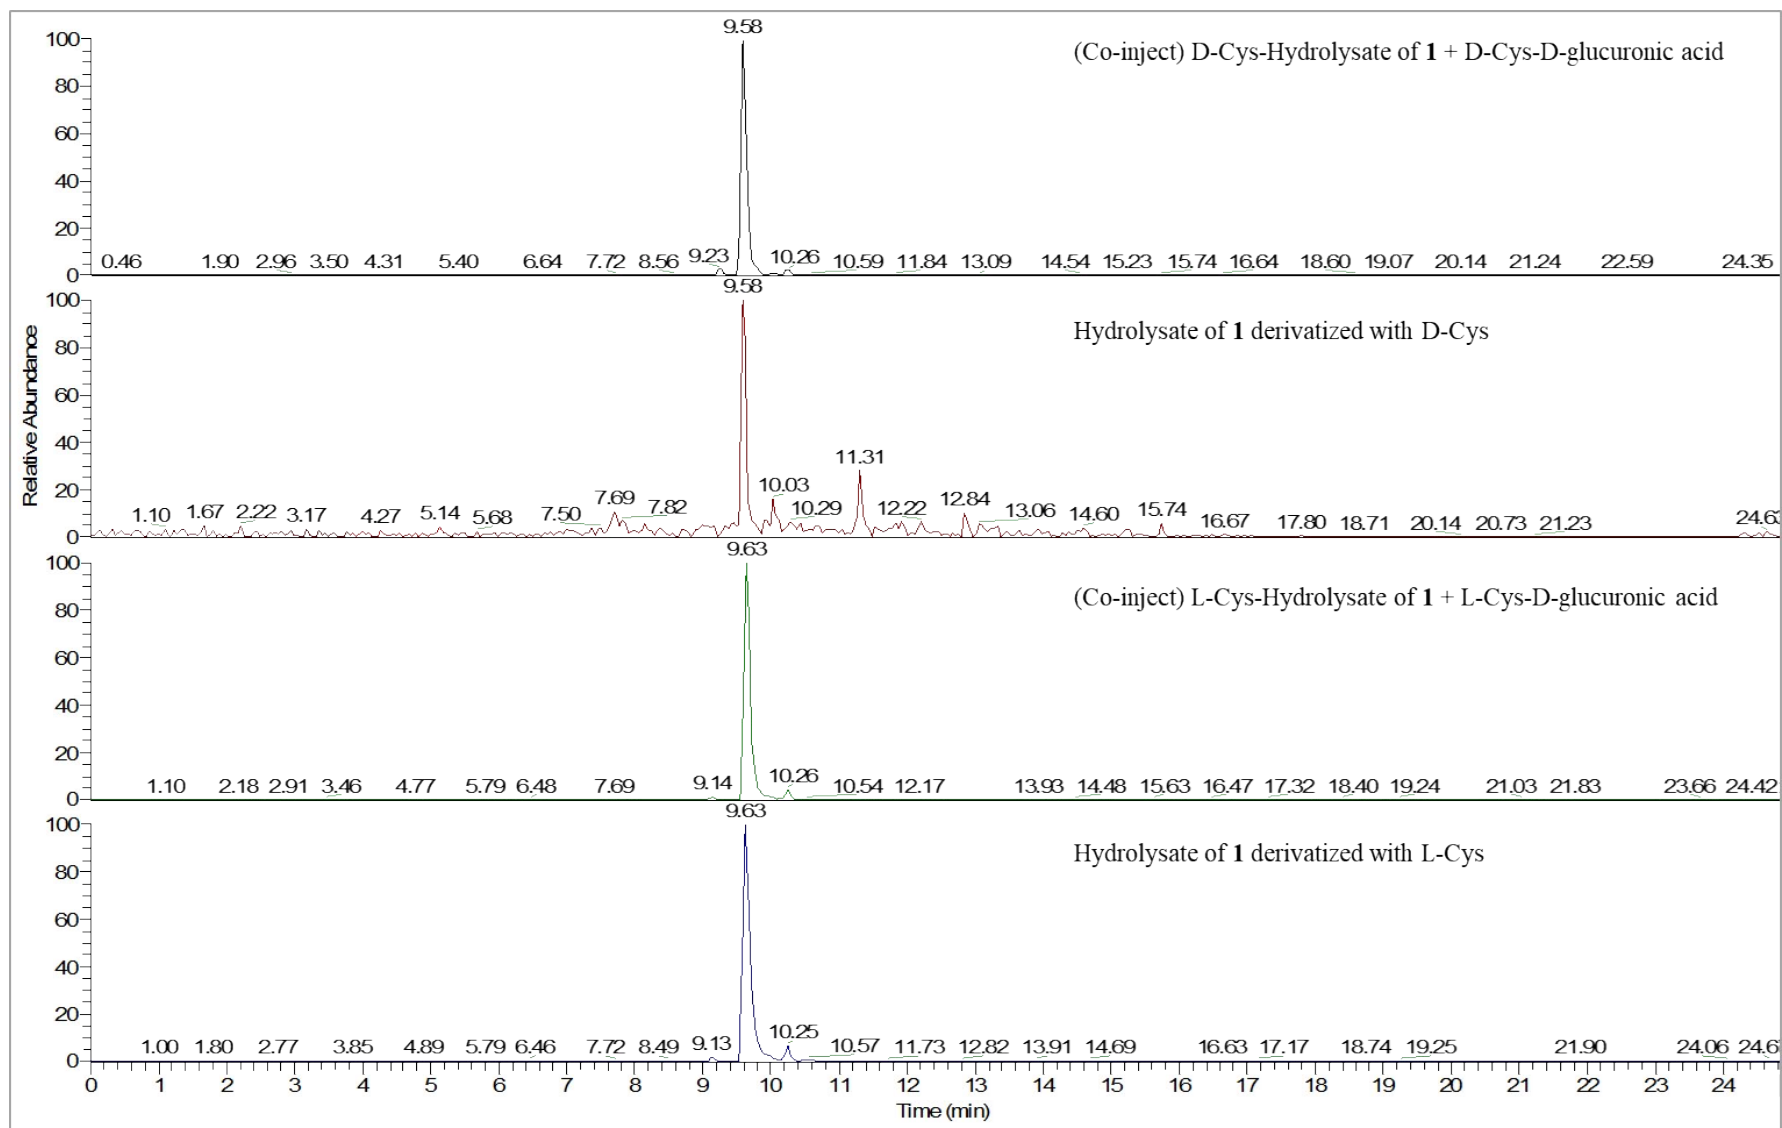

**Fig. S14.** LC-MS analysis for thiocarbamate derivatives of the sugar unit in **1** (Selected ion at  $m/z$  461.0-461.99  $[M+H]^+$ )

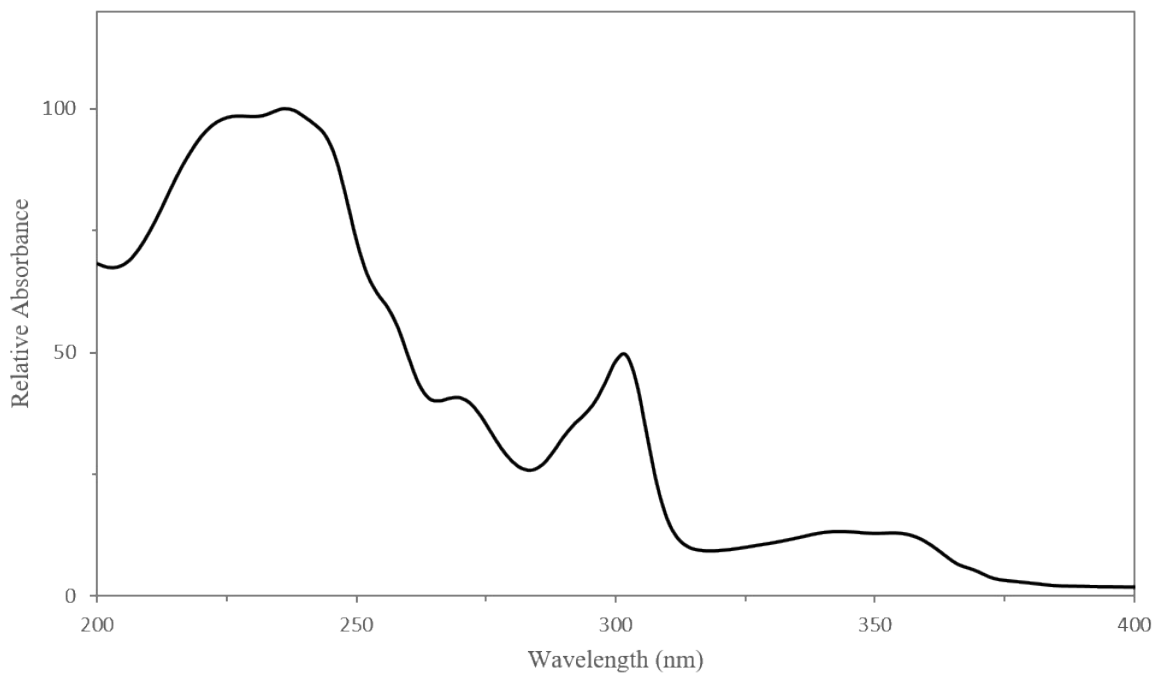

**Fig. S15.** UPLC-UV spectrum of compound **2** in MeCN-H<sub>2</sub>O containing 0.05% Formic acid

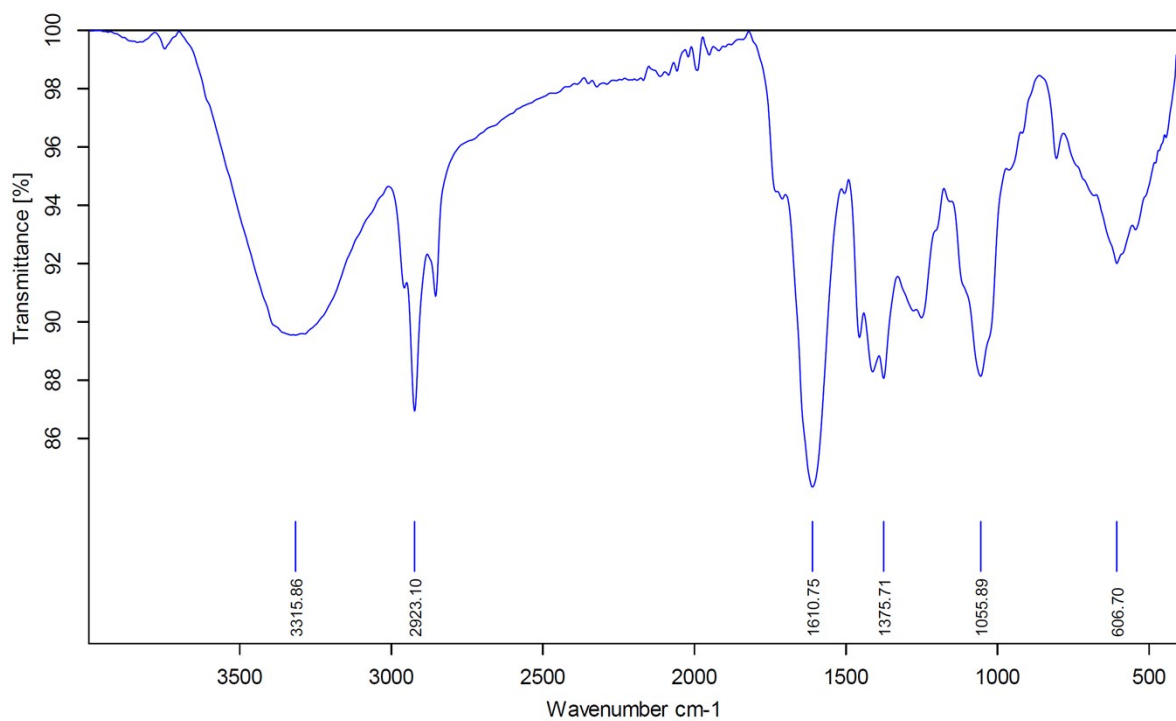

**Fig. S16.** IR spectrum of compound **2**

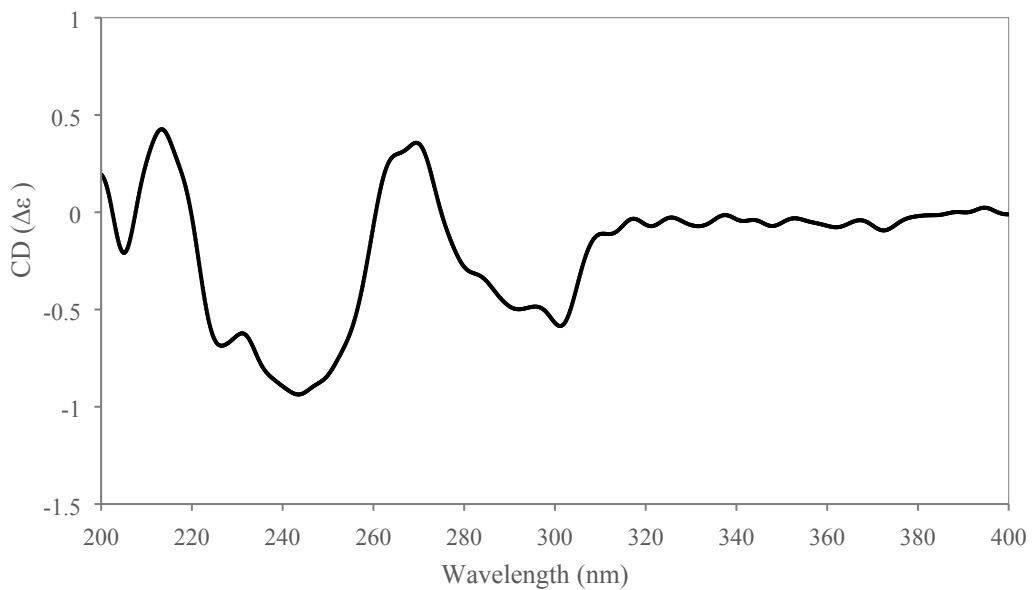

Fig. S17. CD spectrum of compound 2

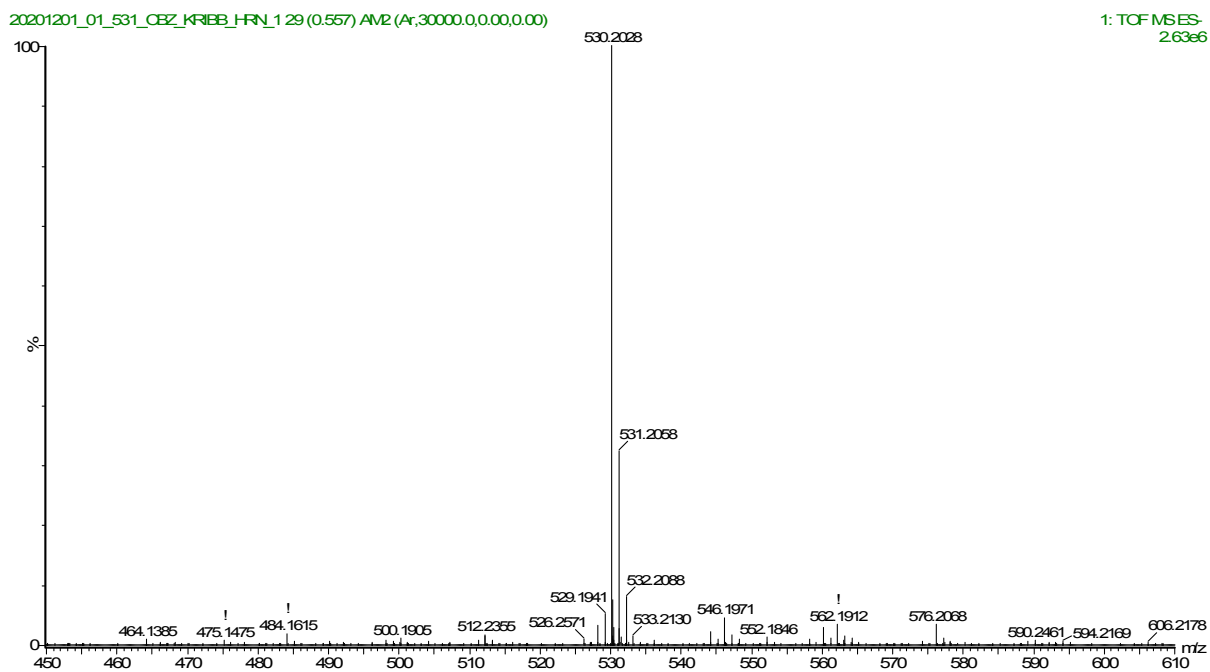

Fig. S18. HR-ESI-TOF-MS negative spectrum in compound 2



KKS\_2E #375-683 RT: 5.88-10.30 AV: 6 NL: 3.22E5  
T: Total composite spectrum for 532.34

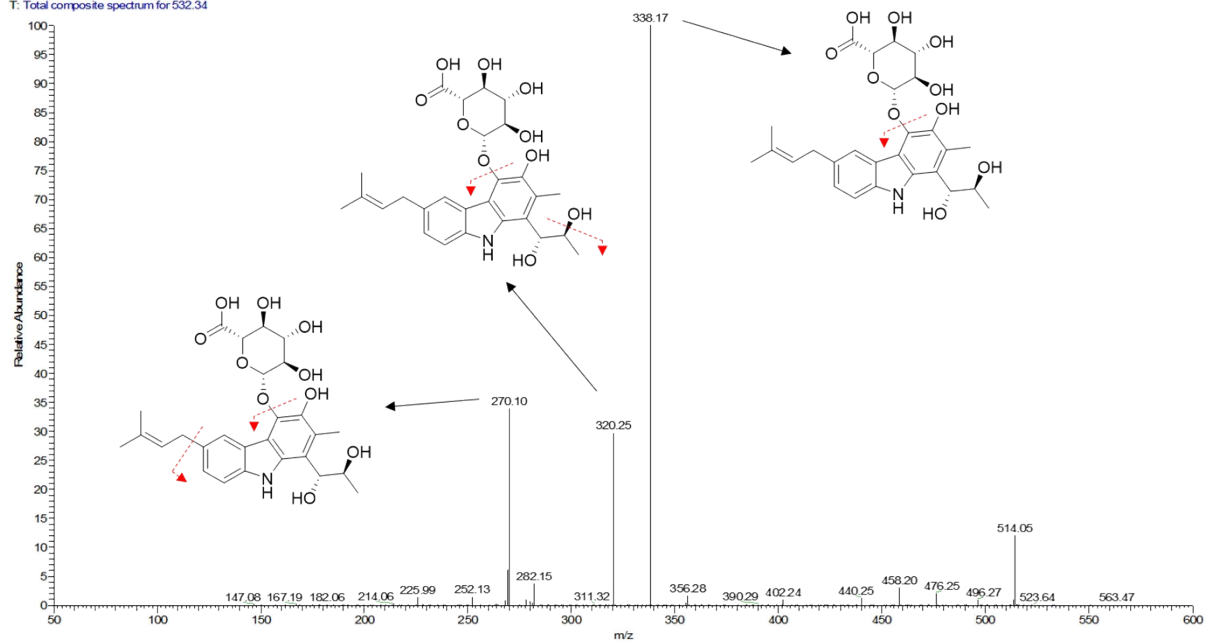

**Fig. S19.** MS/MS fragmentation spectrum of compound 2 (parent ion, 532.34 [M + H]<sup>+</sup>)

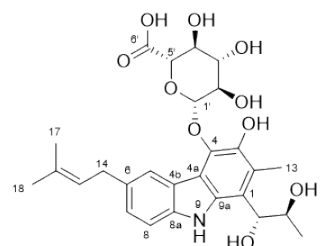

Jejucarbazole B (2)

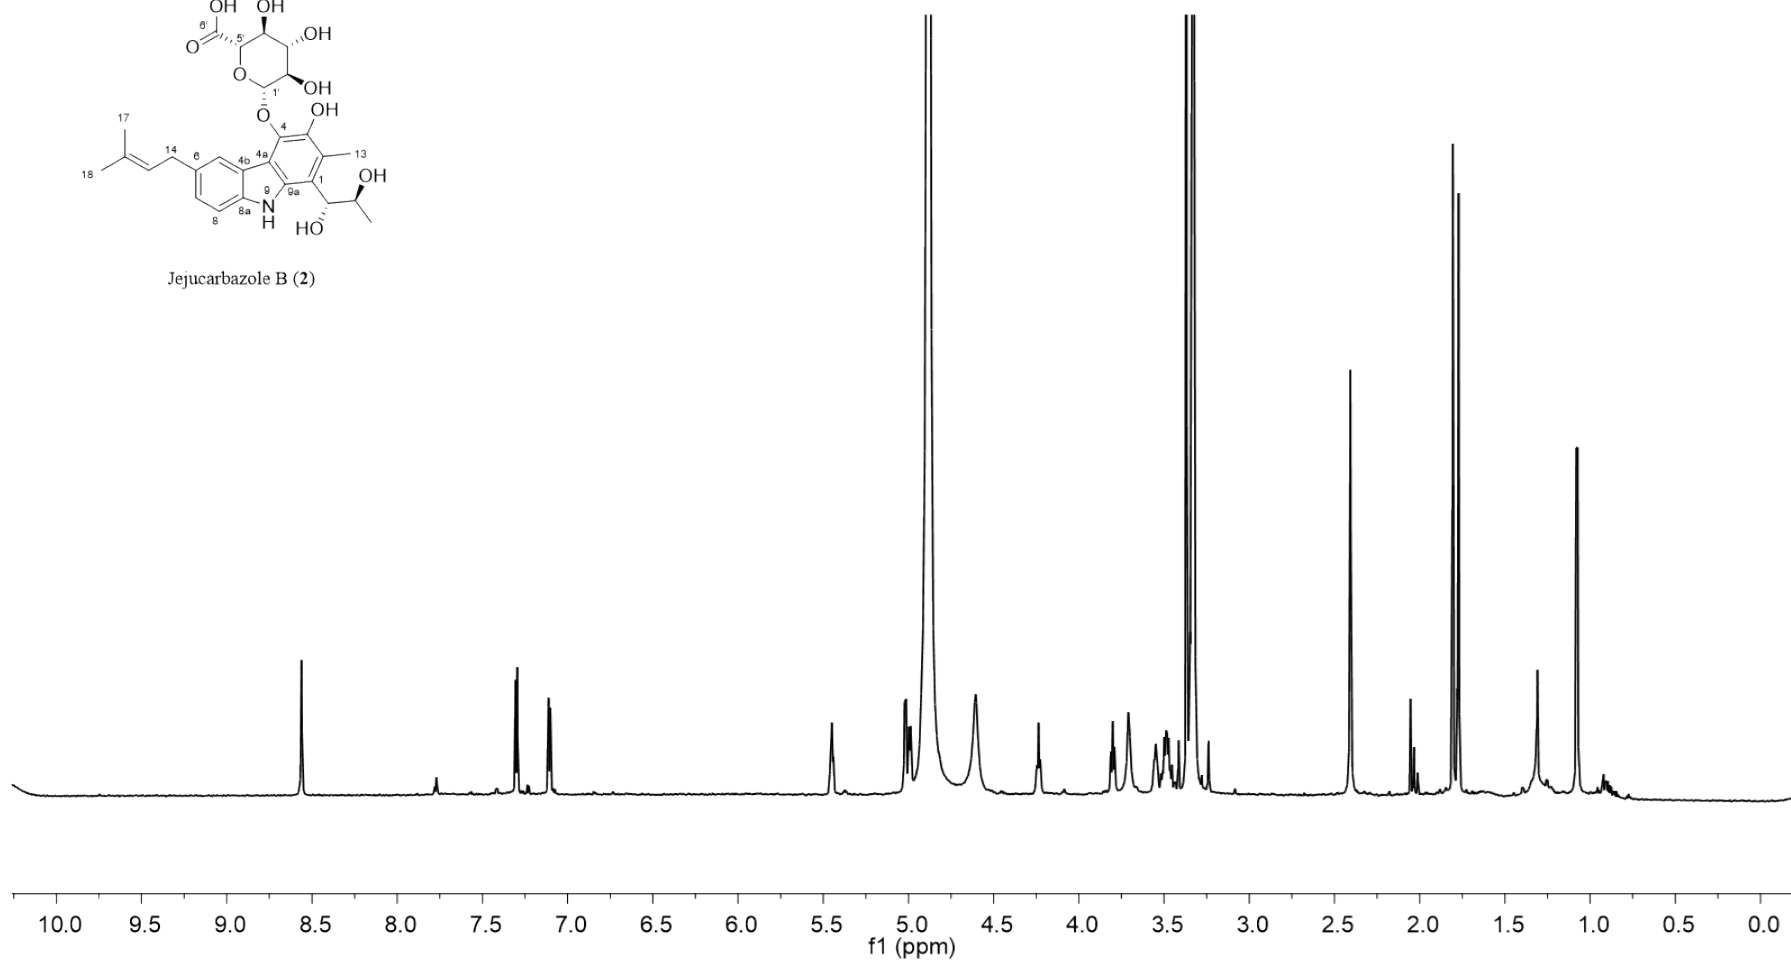

Fig. S20. <sup>1</sup>H NMR spectrum of compound 2 in CD<sub>3</sub>OD



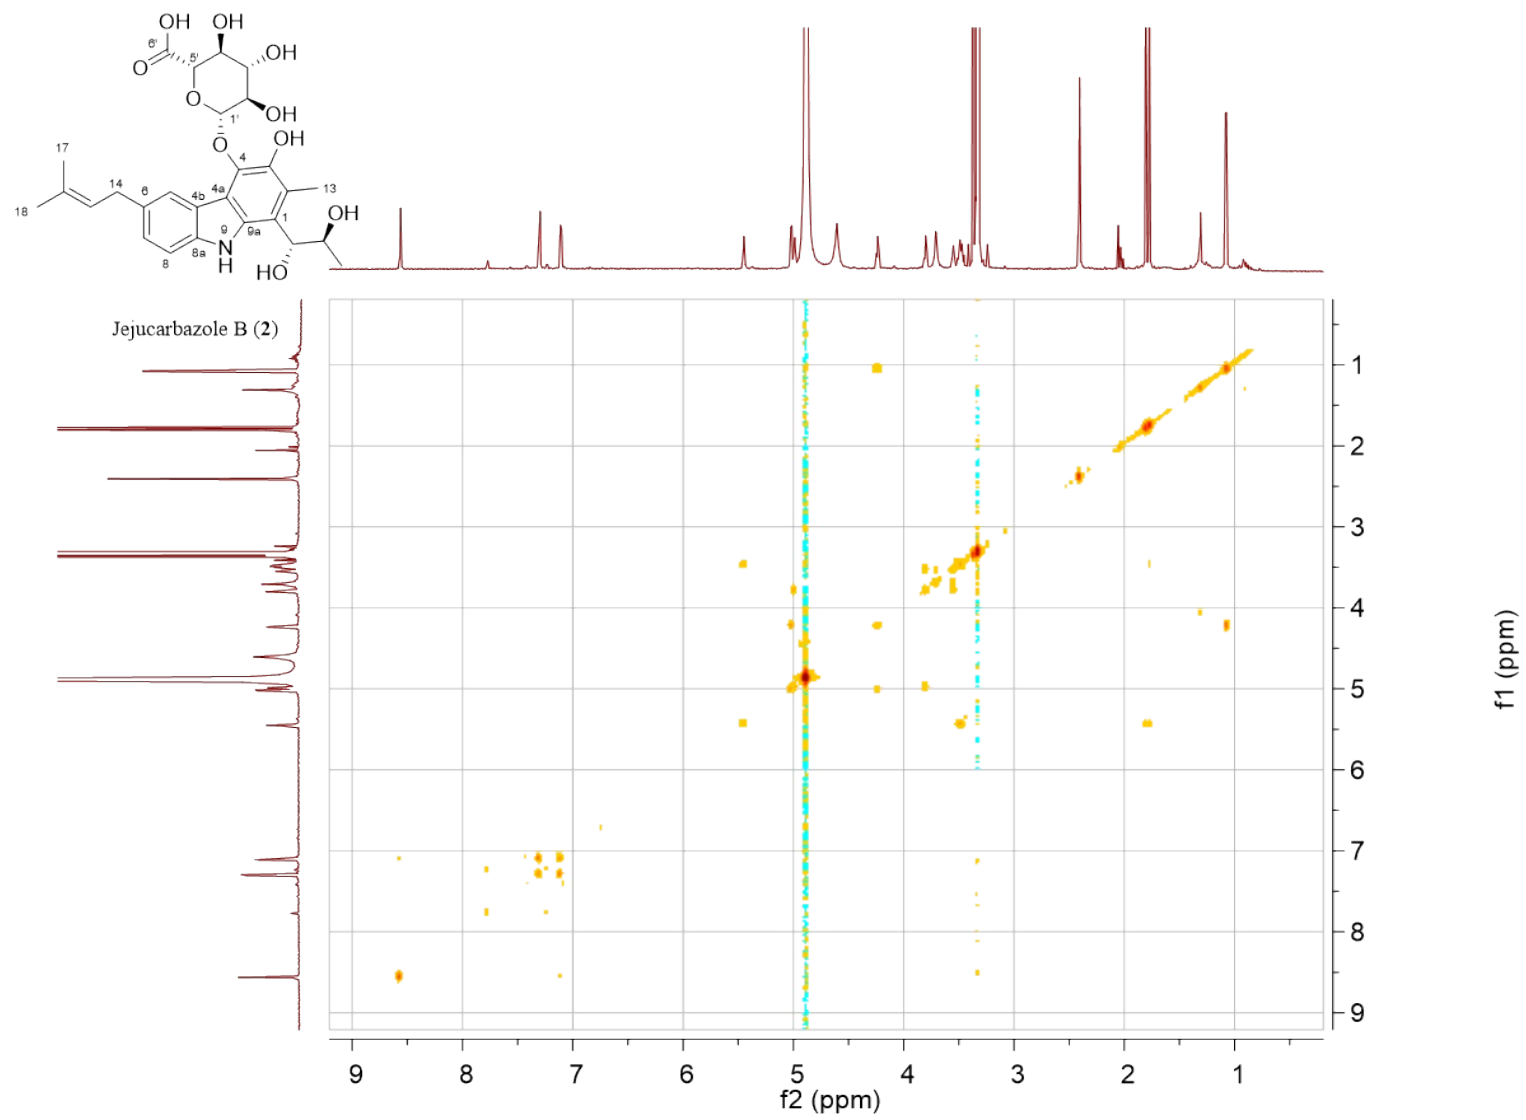

**Fig. S22.** COSY NMR spectrum of compound 2 in CD<sub>3</sub>OD

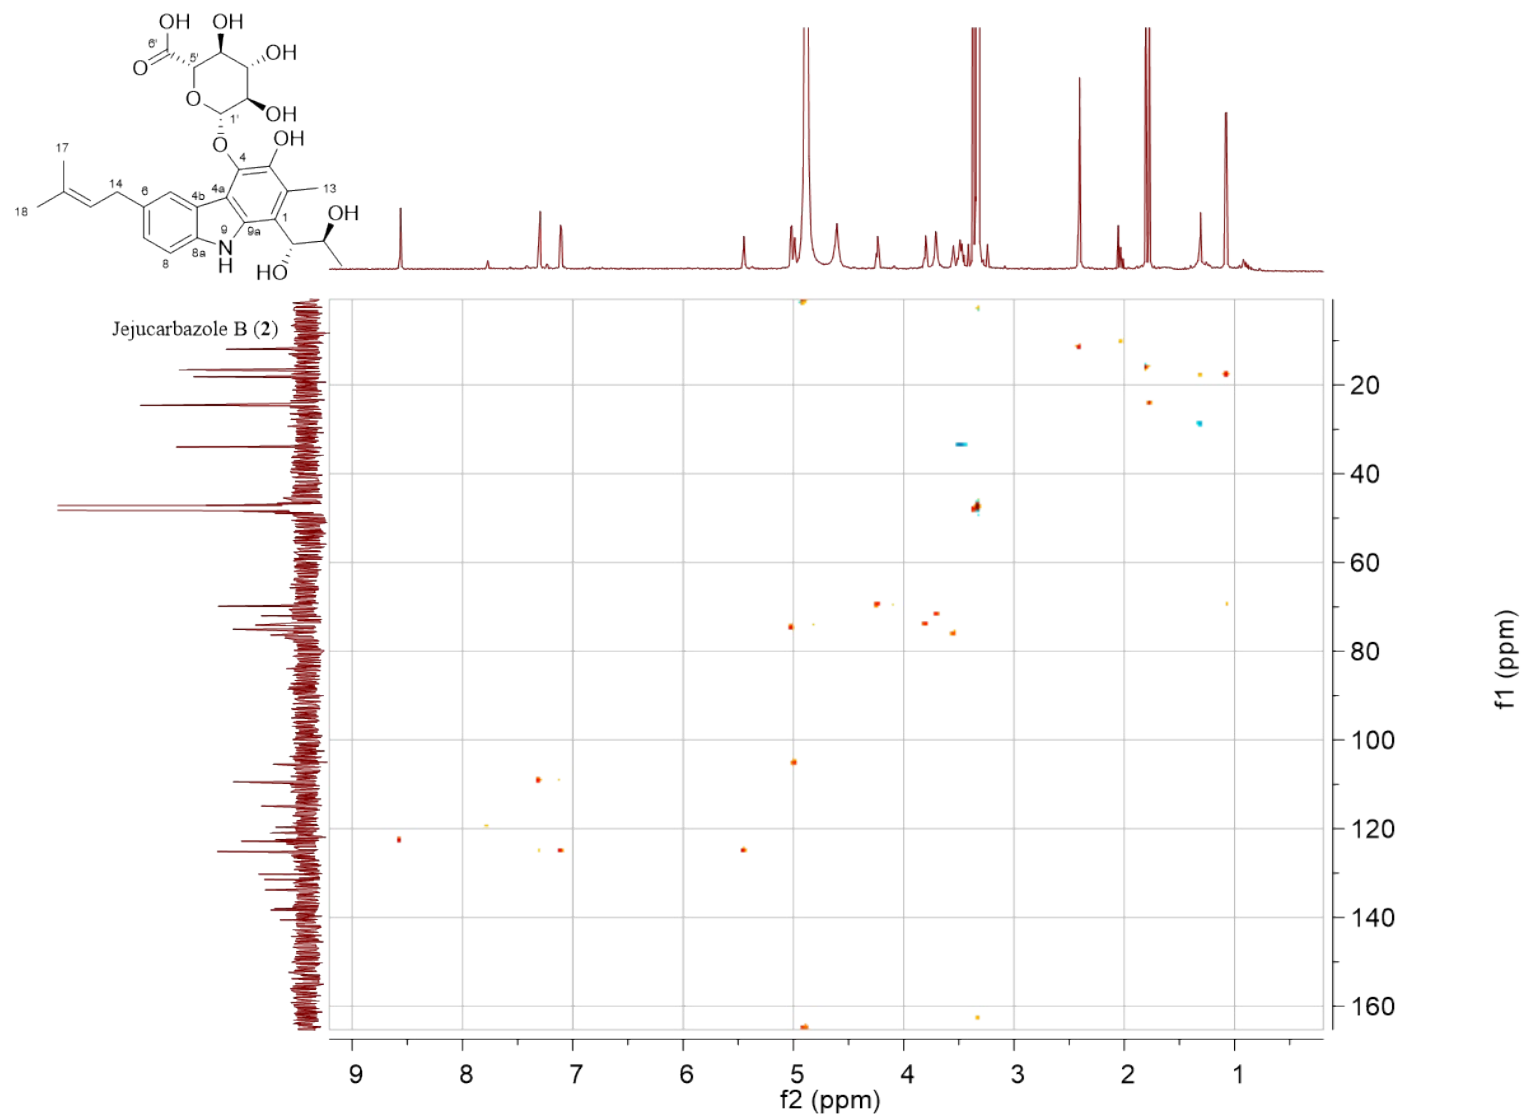

Fig. S23. HSQC-DEPT NMR spectrum of compound 2 in CD<sub>3</sub>OD

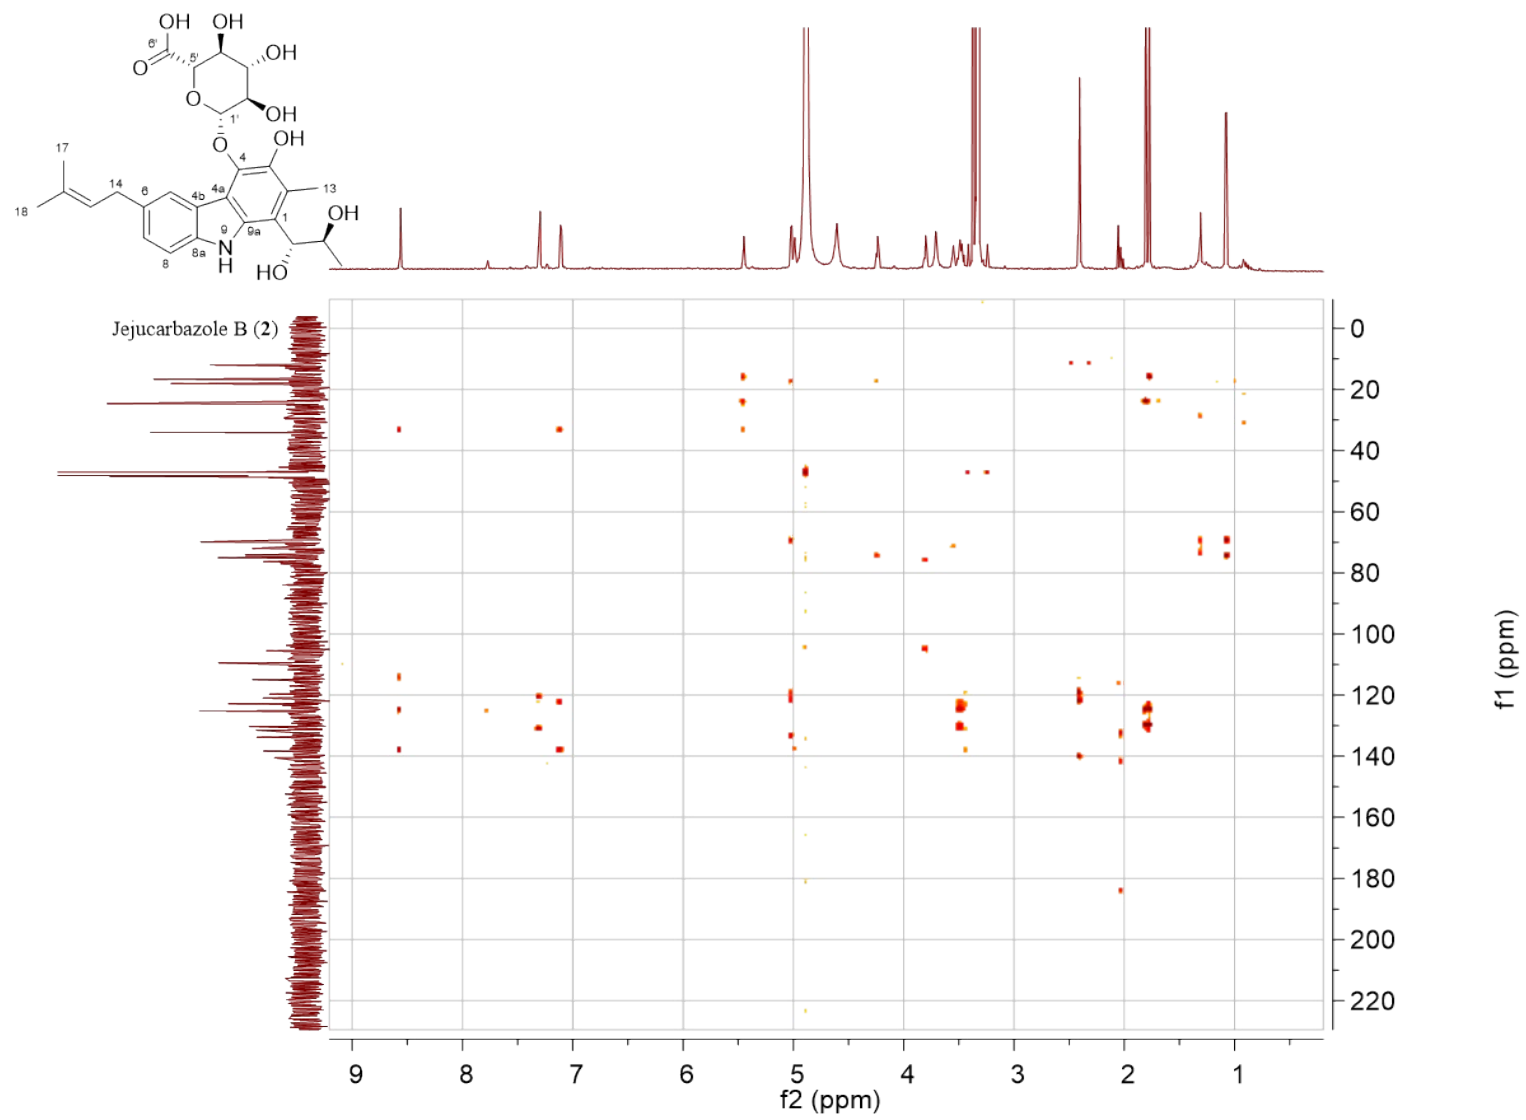

Fig. S24. HMBC NMR spectrum of compound 2 in CD<sub>3</sub>OD

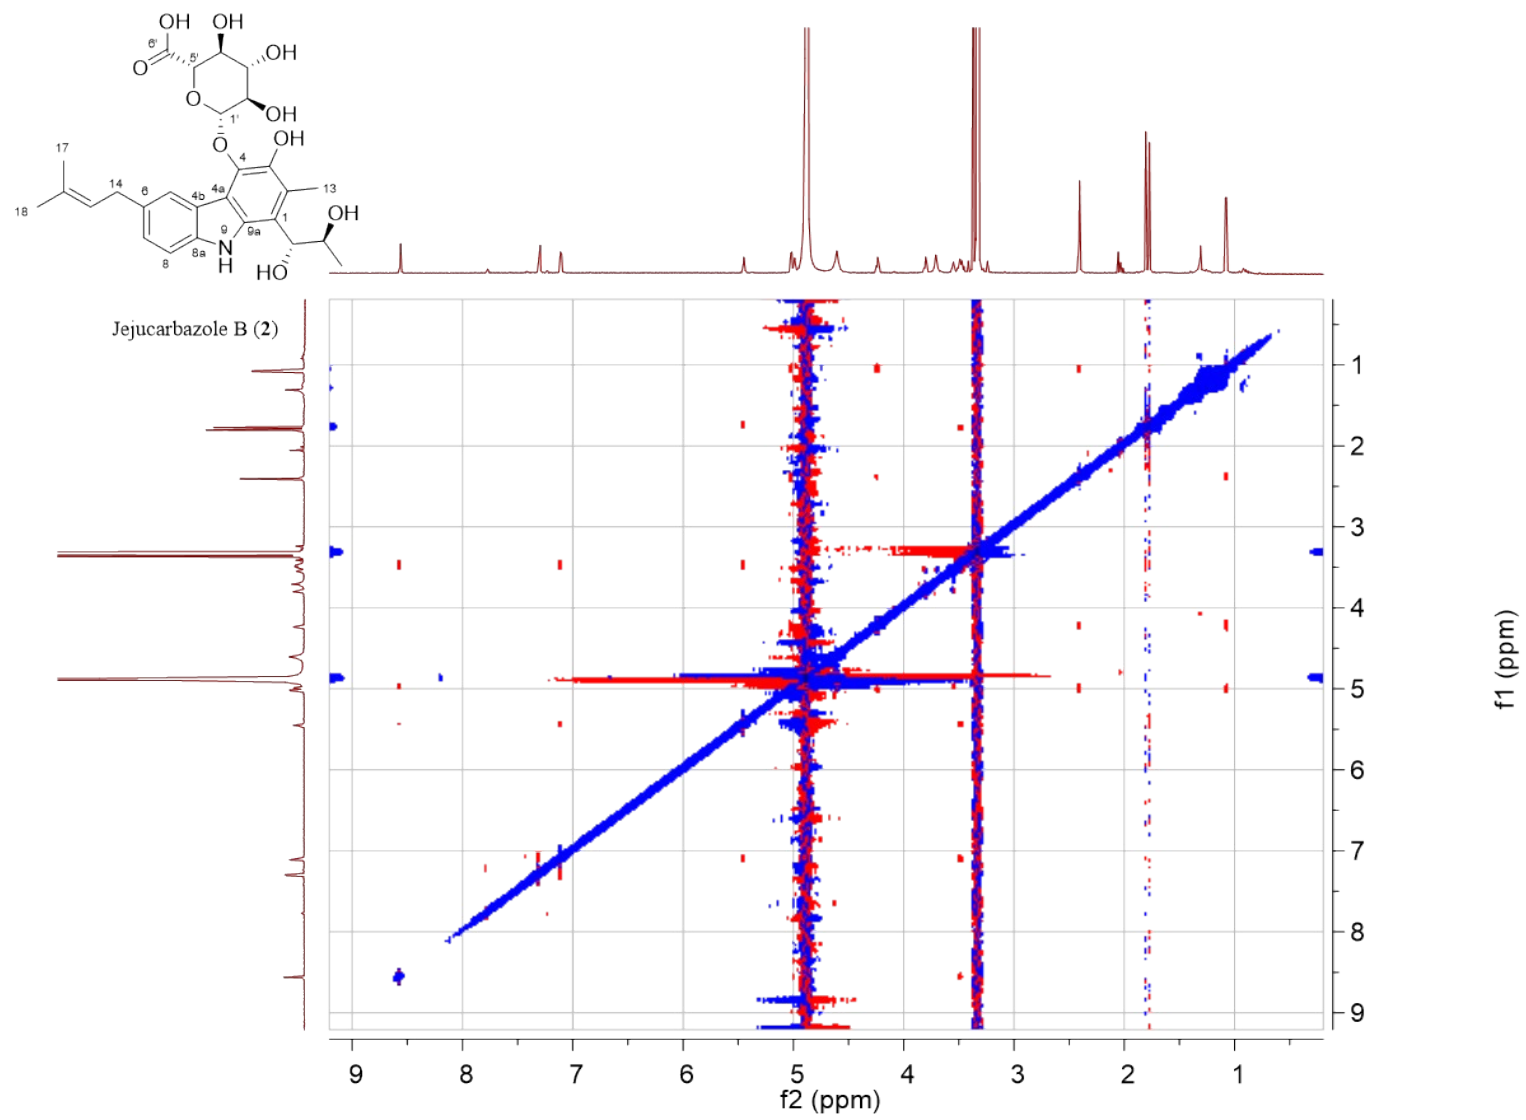

Fig. S25. ROESY NMR spectrum of compound 2 in CD<sub>3</sub>OD

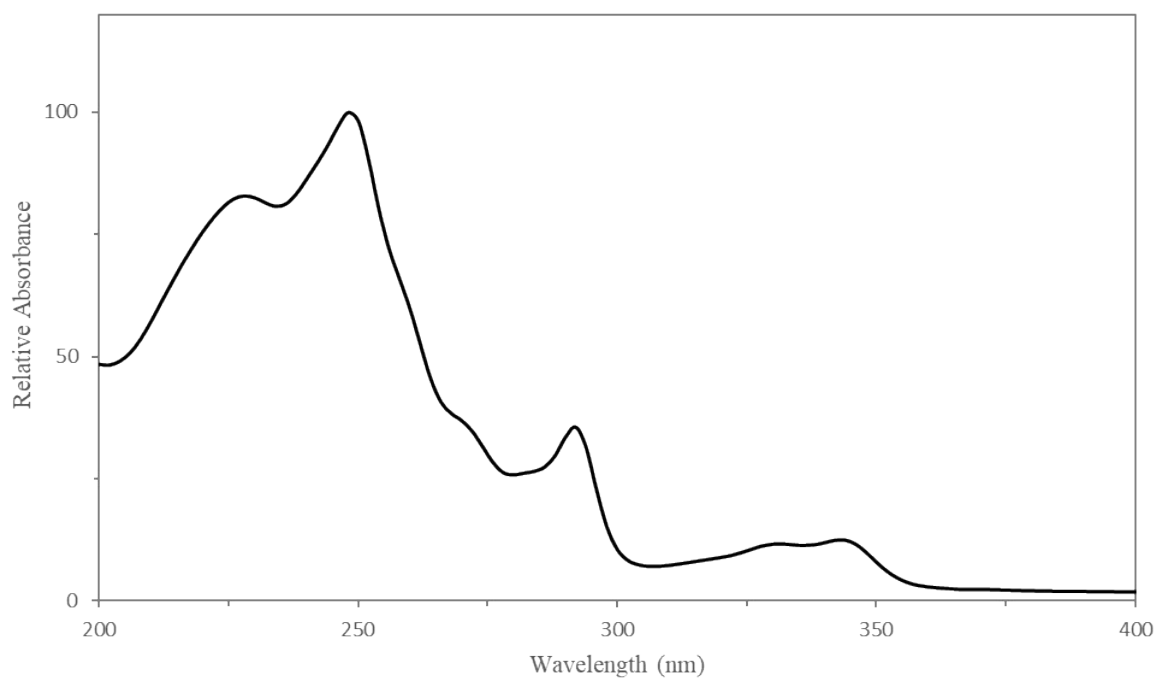

**Fig. S26.** UPLC-UV spectrum of compound **3** in MeCN-H<sub>2</sub>O containing 0.05% Formic acid

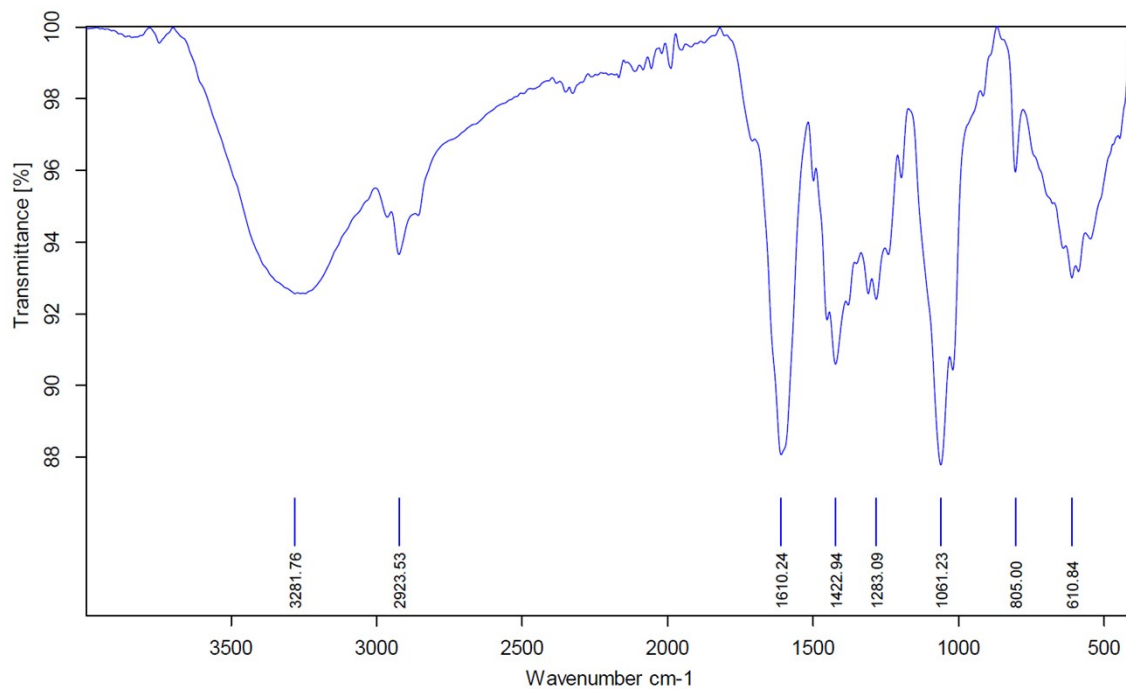

**Fig. S27.** IR spectrum of compound **3**



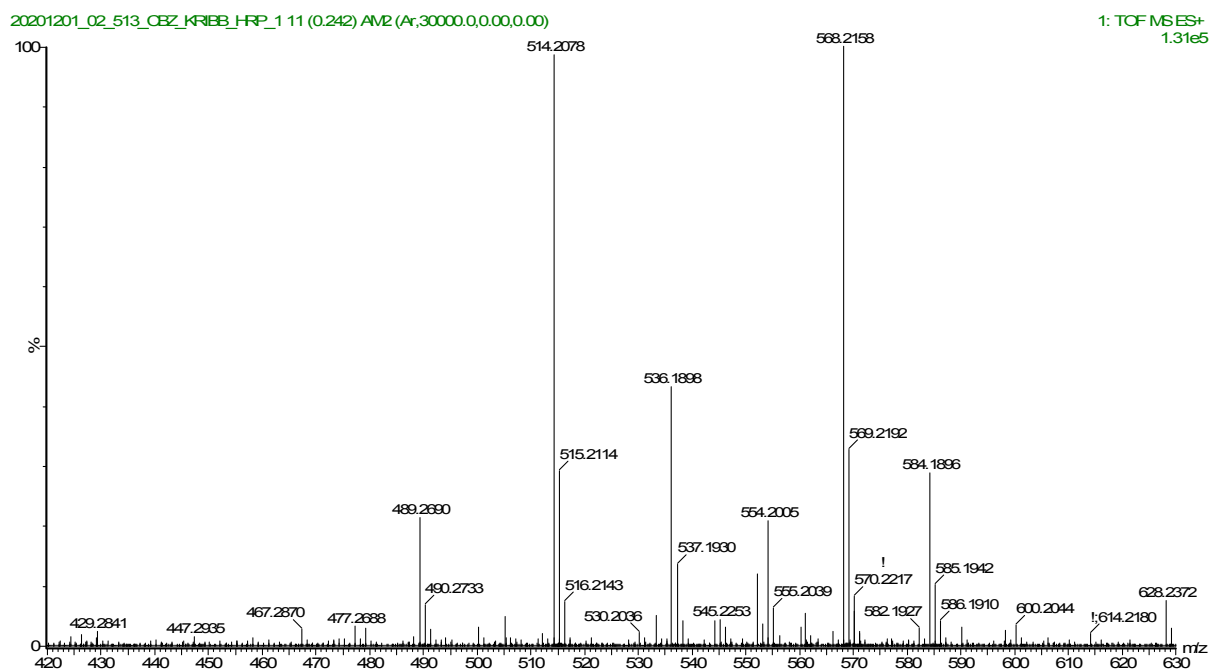

Fig. S28. HR-ESI-TOF-MS positive spectrum in compound 3

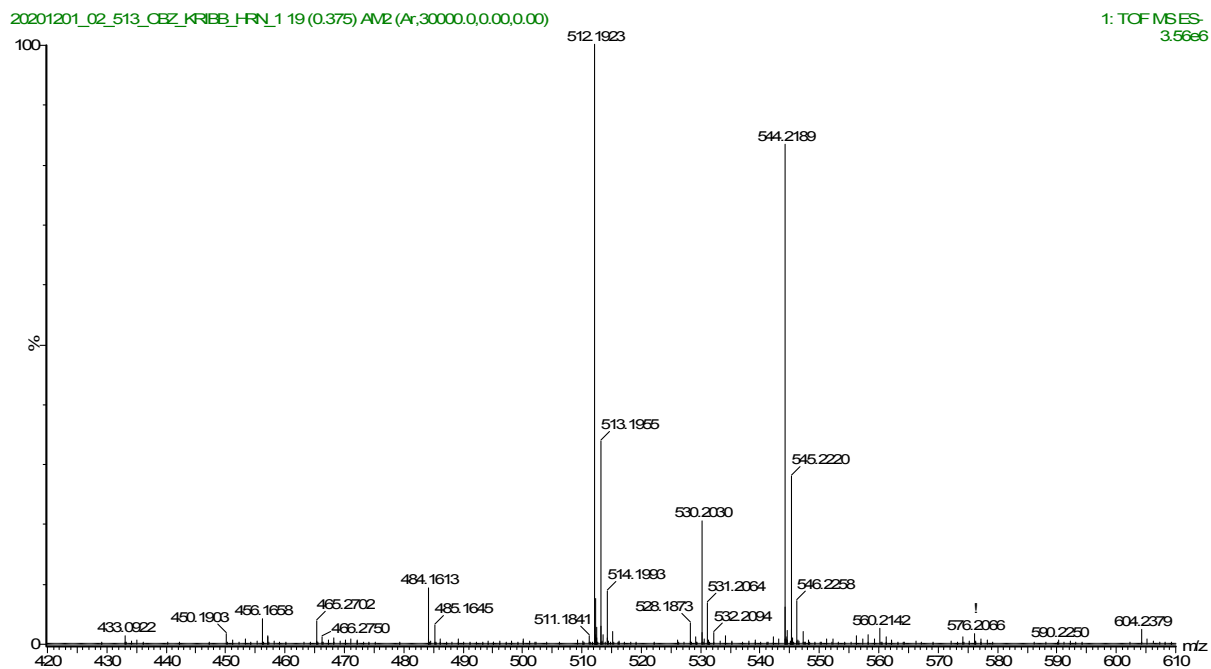

Fig. S29. HR-ESI-TOF-MS negative spectrum in compound 3

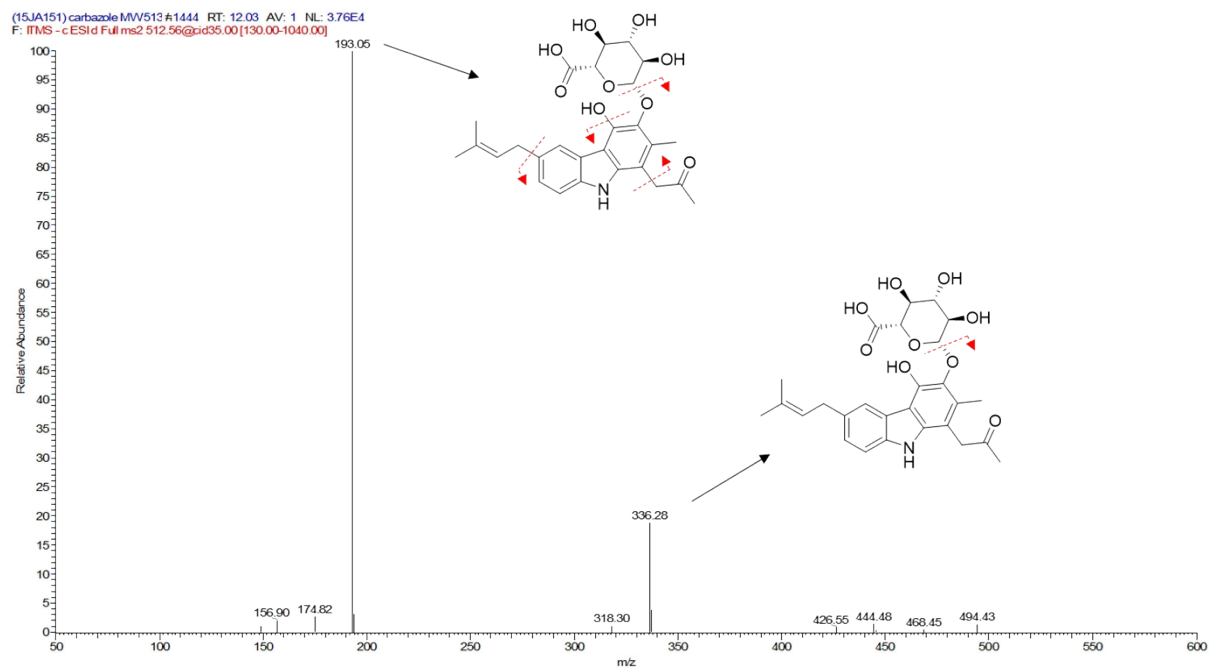

**Fig. S30.** MS/MS fragmentation spectrum of compound **3** (parent ion, 512.56 [M - H]<sup>-</sup>)

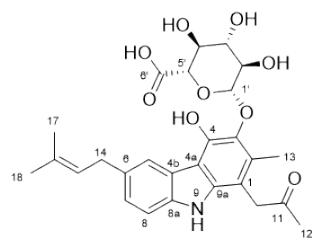

Jejucarbazole C (3)

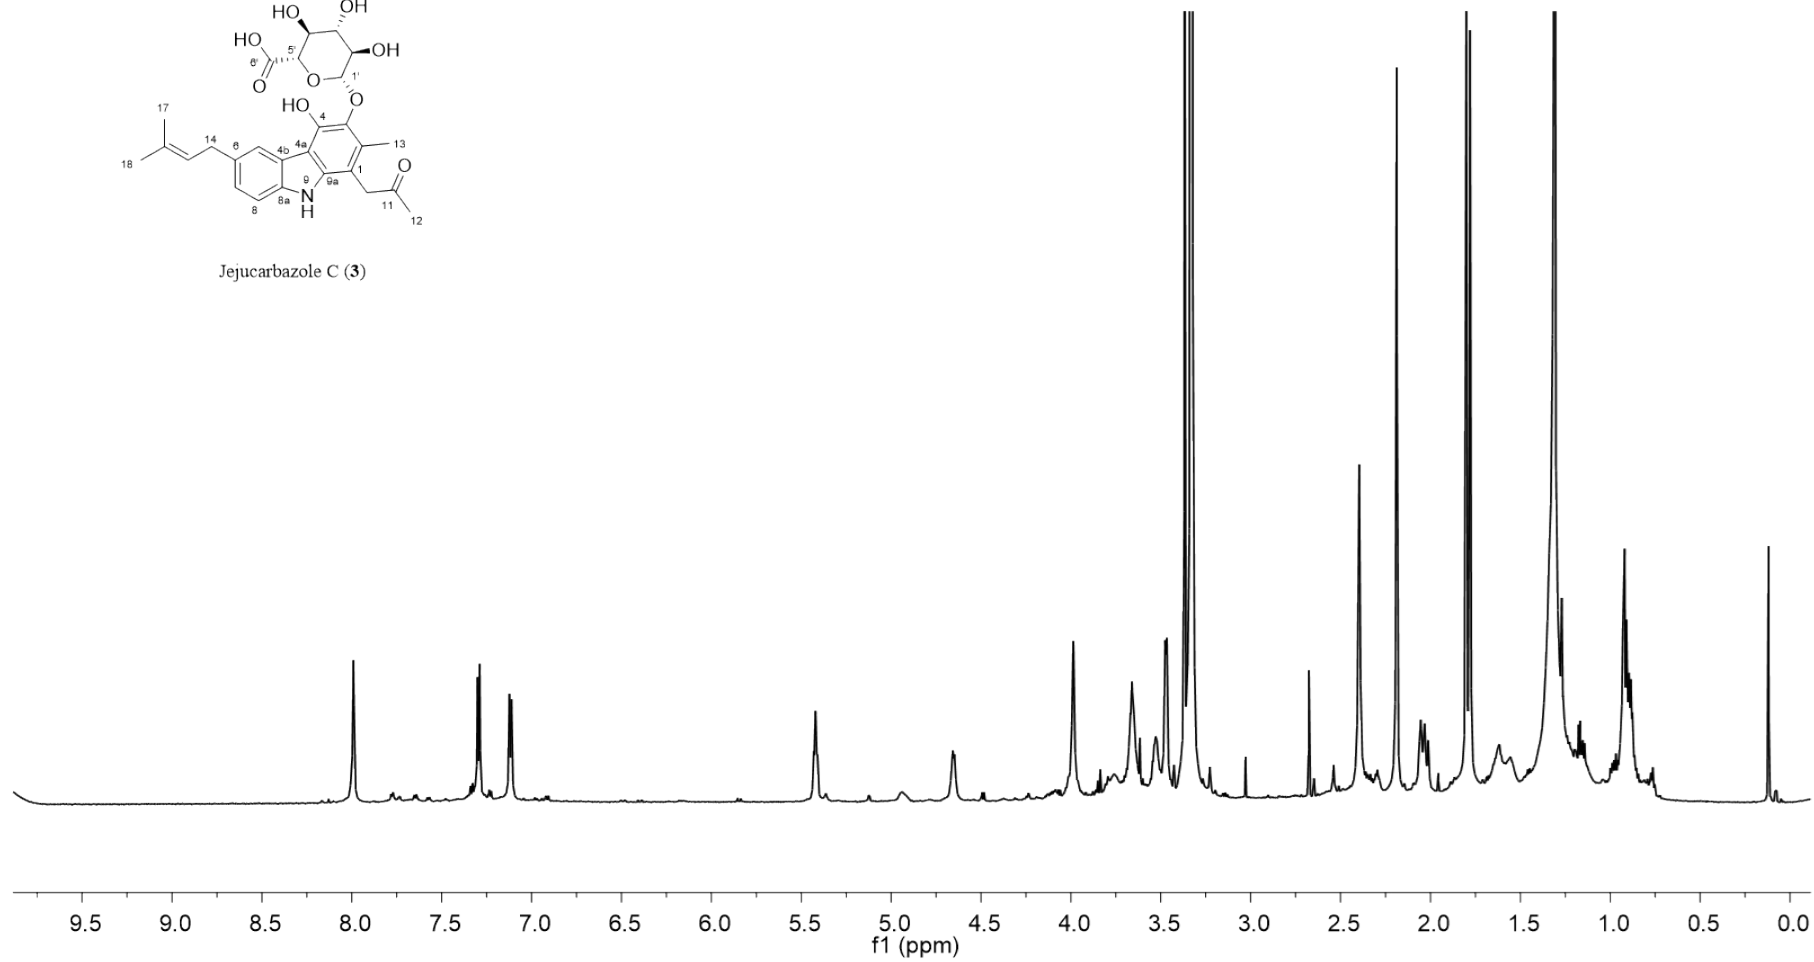

Fig. S31. <sup>1</sup>H NMR spectrum of compound 3 in CD<sub>3</sub>OD

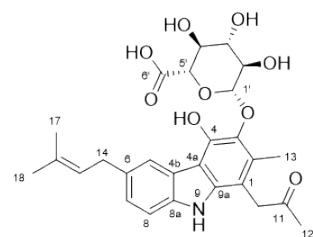

Jejudarbazole C (3)

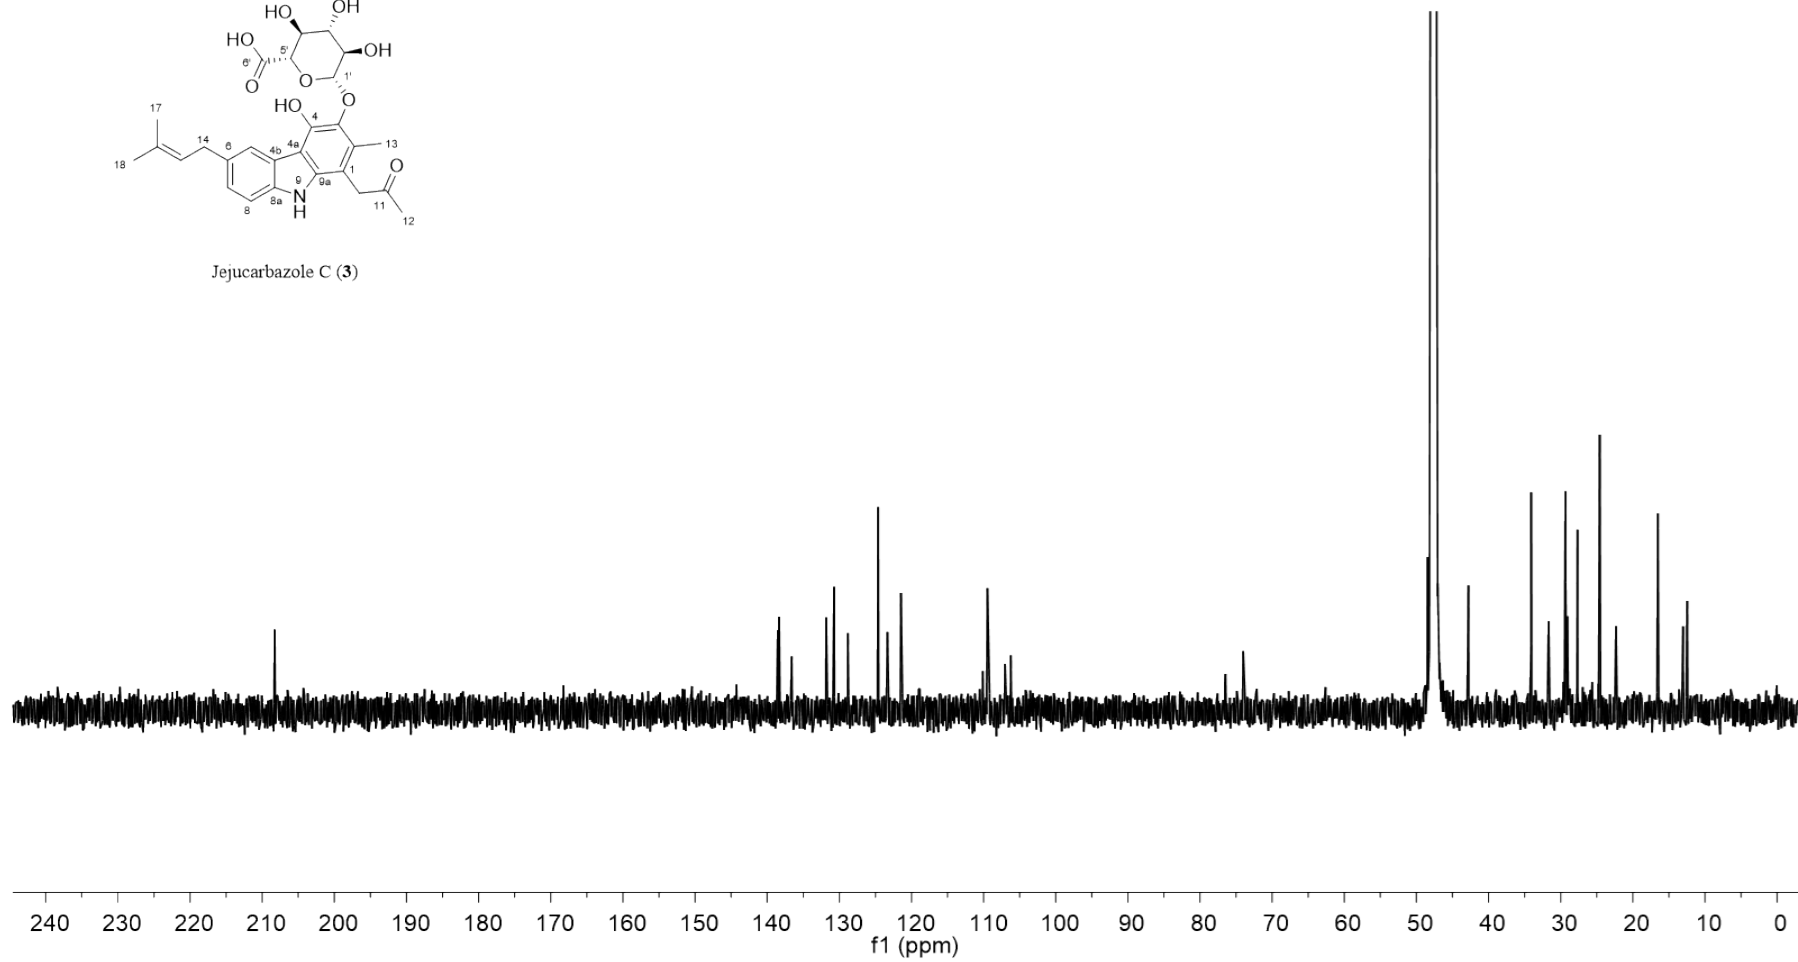

Fig. S32. <sup>13</sup>C NMR spectrum of compound 3 in CD<sub>3</sub>OD

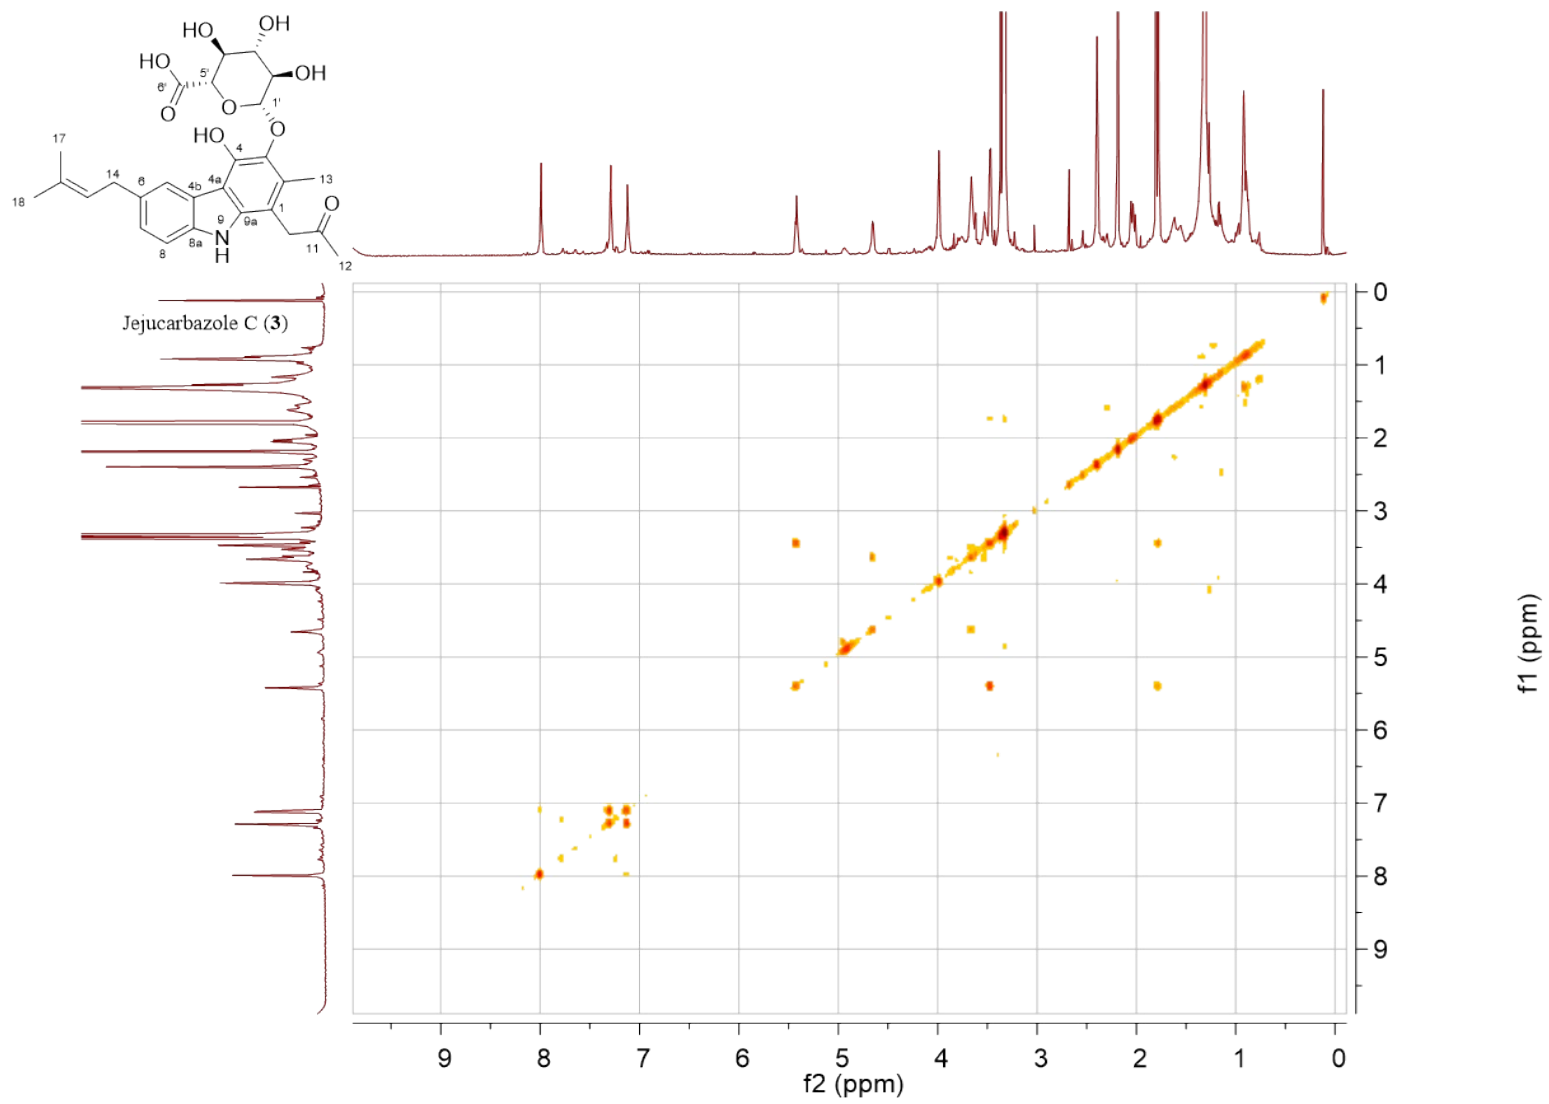

Fig. S33. COSY NMR spectrum of compound 3 in CD<sub>3</sub>OD

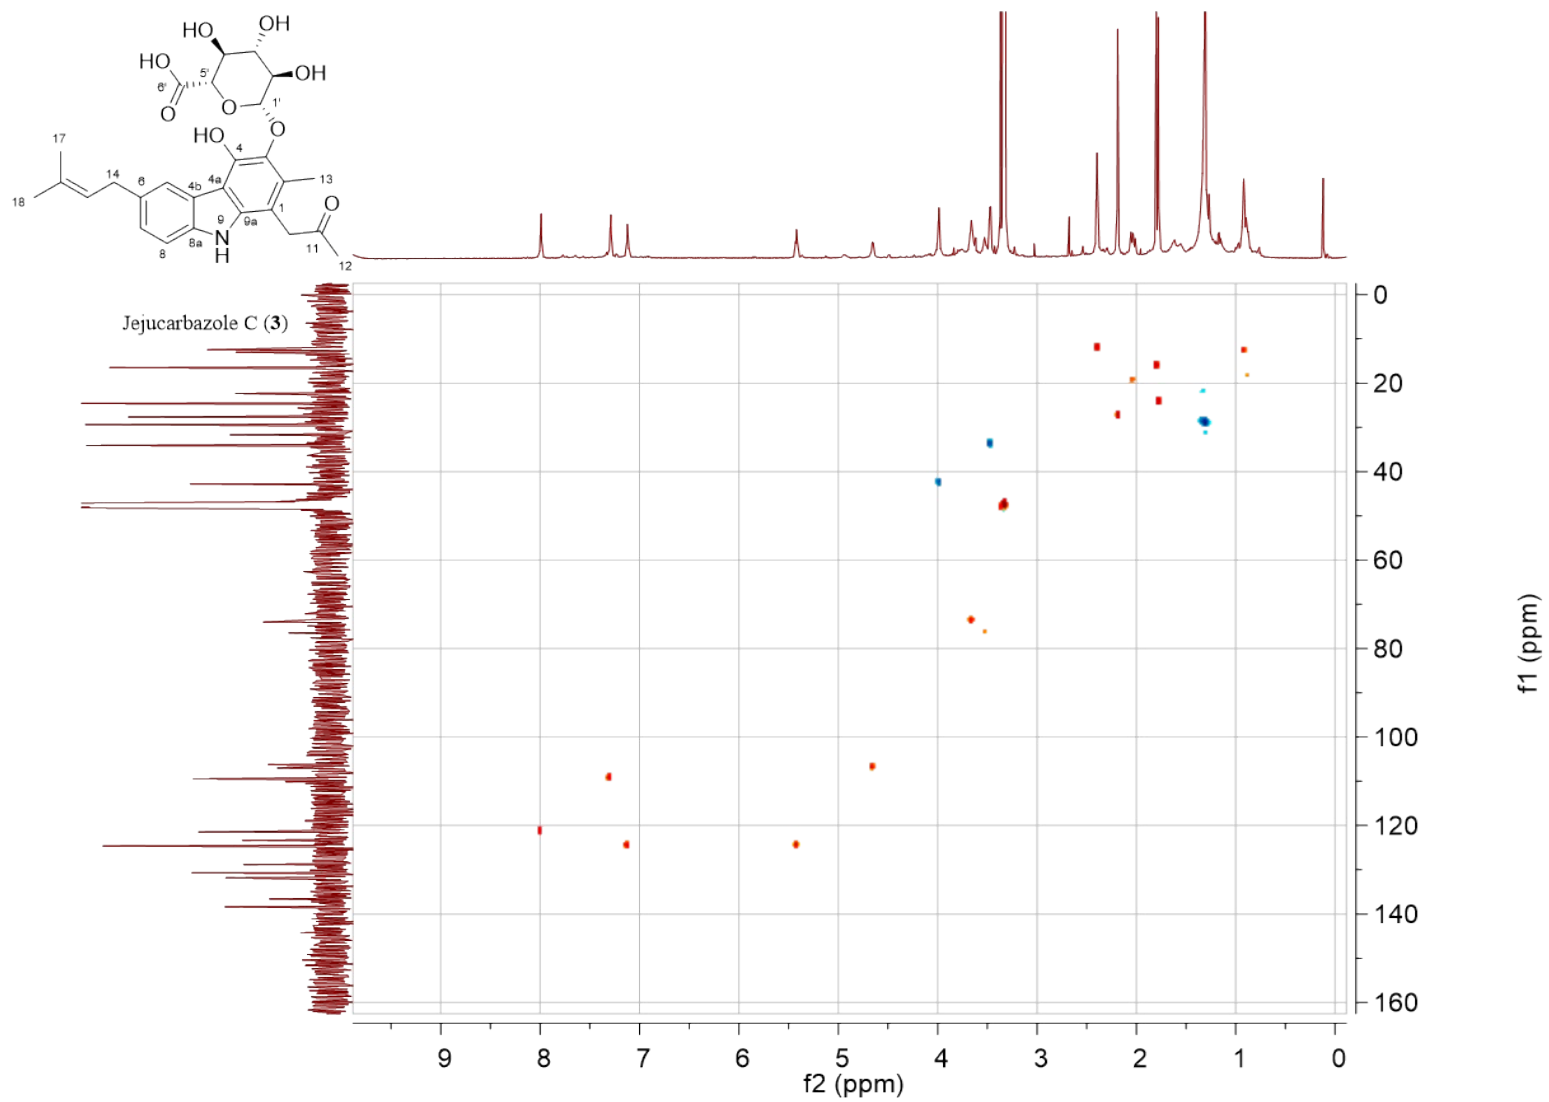

Fig. S34. HSQC-DEPT NMR spectrum of compound 3 in CD<sub>3</sub>OD

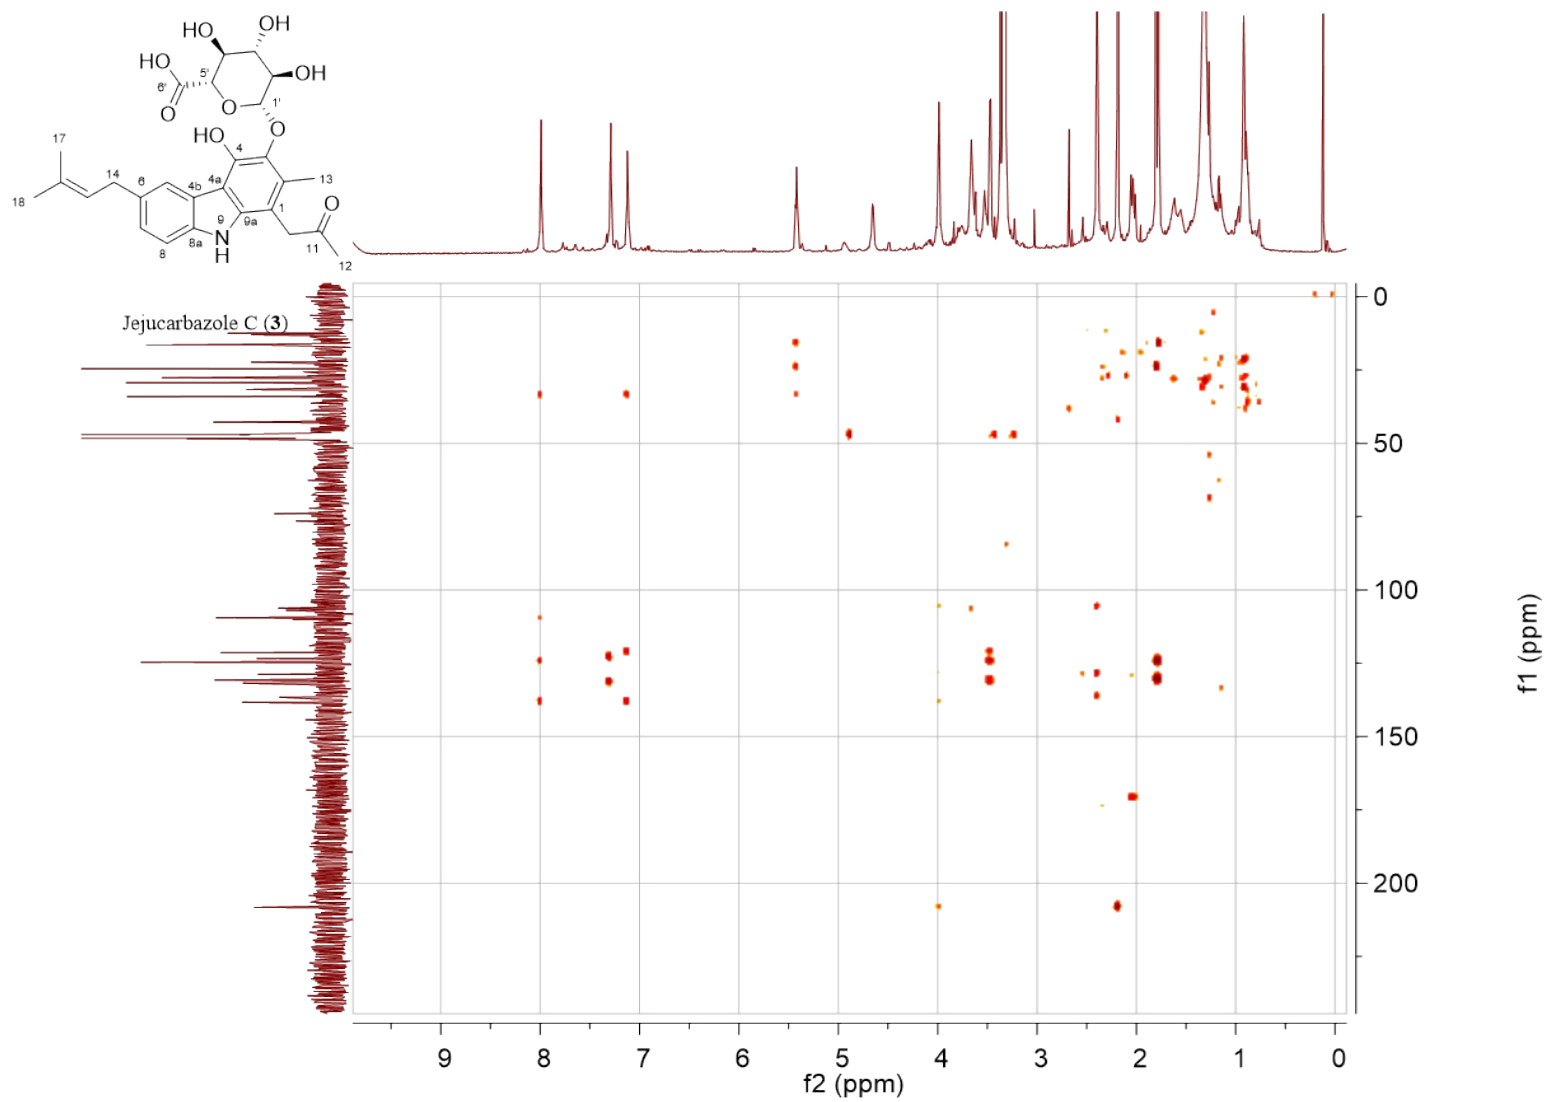

Fig. S35. HMBC NMR spectrum of compound 3 in CD<sub>3</sub>OD

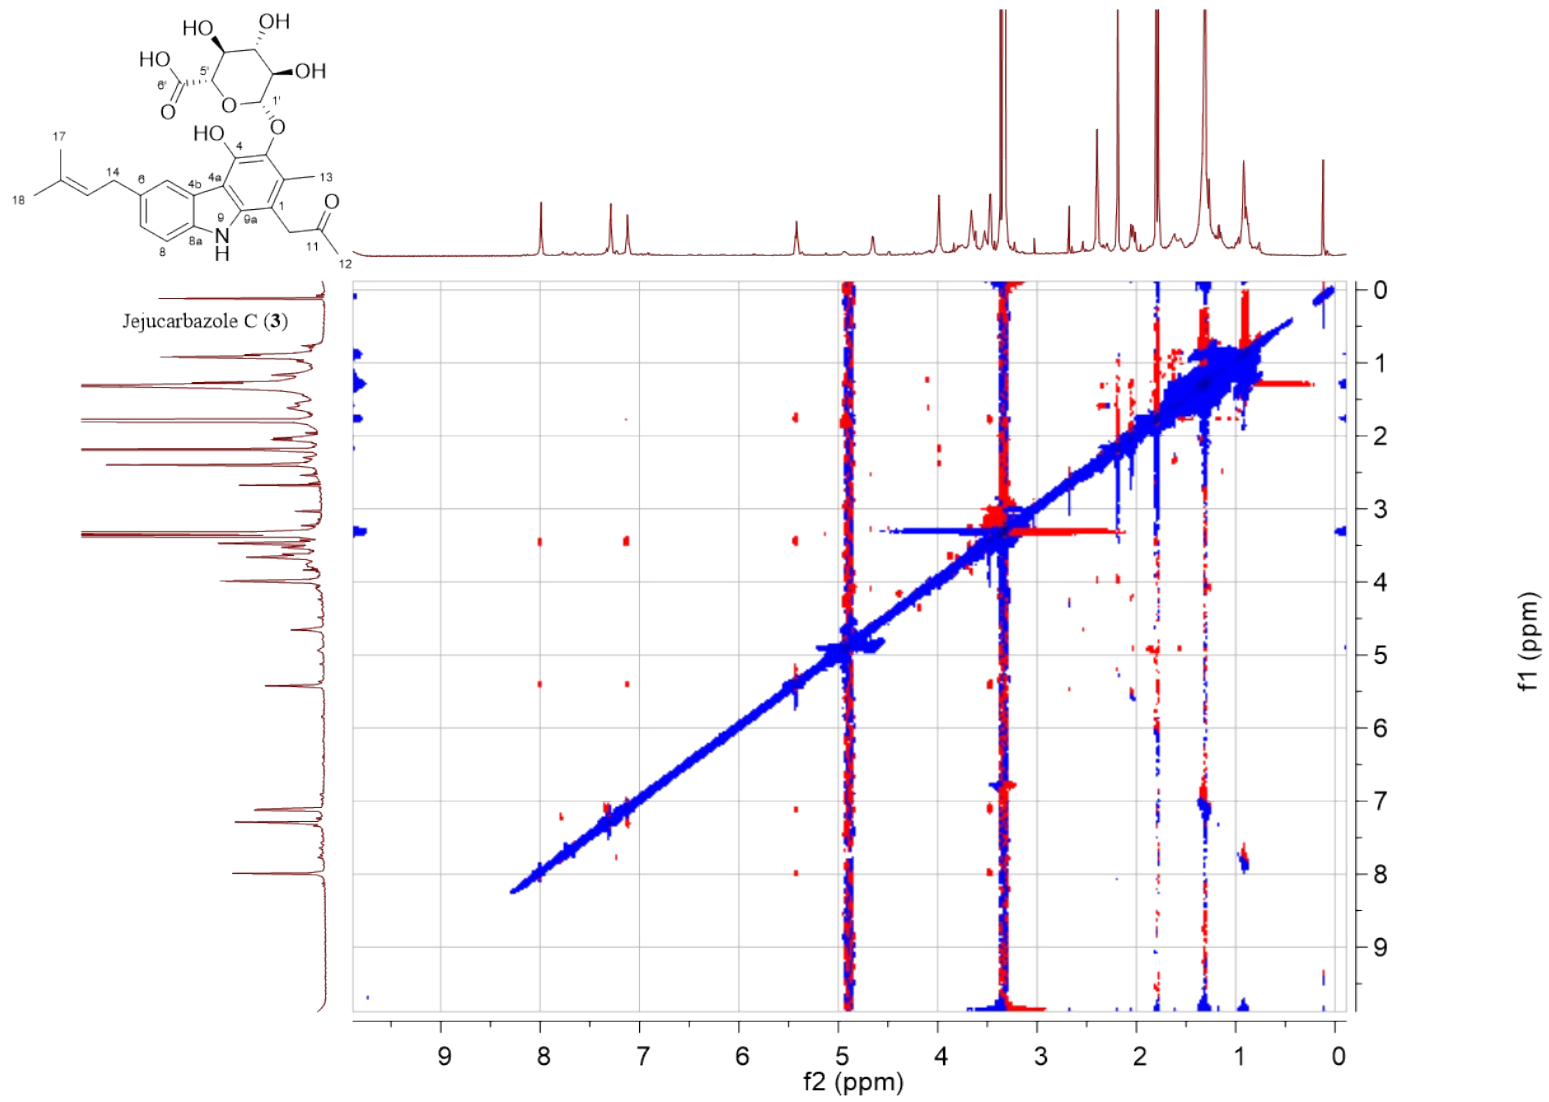

Fig. S36. ROESY NMR spectrum of compound 3 in CD<sub>3</sub>OD



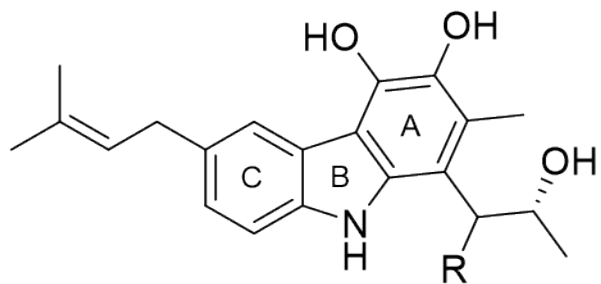

Neocarazostatin A: R = OH  
 Neocarazostatin B: R = H  
 Neocarazostatin C: R = OMe

Dihydroxyl type CA

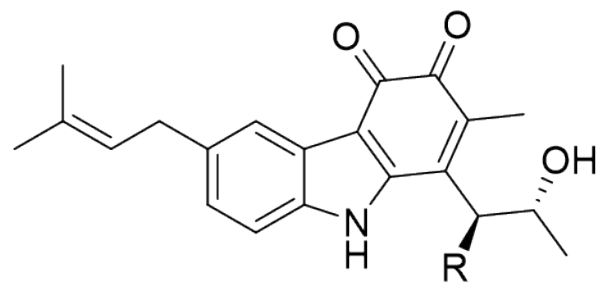

Carquinostatin A: R = H  
 Carquinostatin B: R = OH

*ortho*-Quinone type CA

**Fig. S37.** Chemical structures of neocarazostains and carquinostatins

*Jejucarbazole putative Biosynthetic gene cluster*

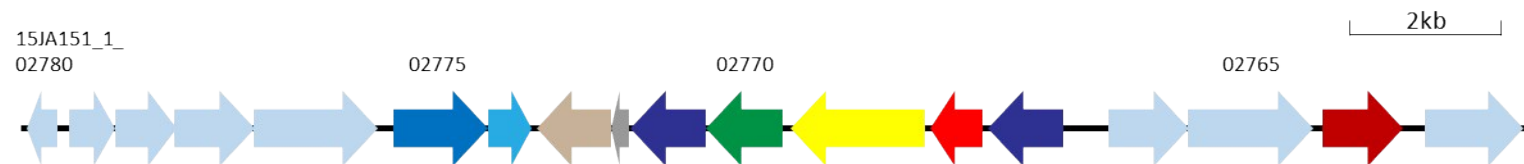

*Neocarazostatin(NZS)*

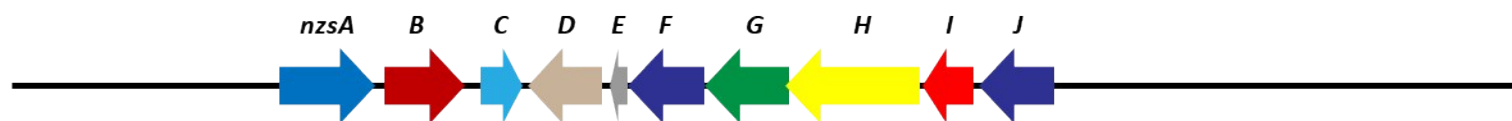

*Carquinostatin (CQS)*

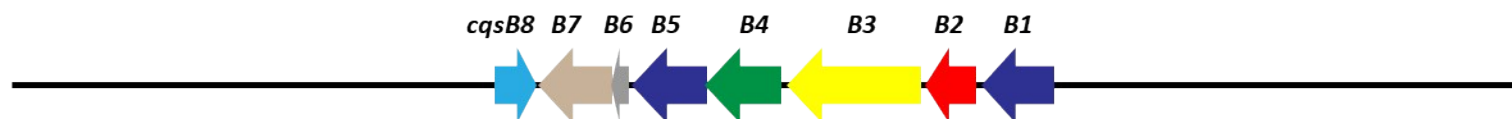

**Fig. S38.** Comparison of the putative jejucarbazole biosynthetic gene cluster in *Streptomyces* sp. KCB15JA151 with neocarazostatin (GenBank: LC406090.1) and carquinostatin (GenBank: KP657980.1) gene clusters.

**Table S1.** Predicted functions and homologues in the putative jejucarbazole biosynthetic gene cluster

| Protein         | Size (aa) | Predicted Function                                    | Homologue in Neocarazostatin |                     | Best match                                              |                     |
|-----------------|-----------|-------------------------------------------------------|------------------------------|---------------------|---------------------------------------------------------|---------------------|
|                 |           |                                                       | Protein / GeneBank (residue) | Identity/Similarity | Organism / GeneBank (residue)                           | Identity/Similarity |
| 15JA151_1_02780 | 133       | Putative response regulatory protein                  |                              |                     | <i>Streptomyces sp.</i> WELS2 / WP_181792968.1 (133)    | 99 / 99             |
| 15JA151_1_02779 | 206       | Heme-copper oxidase subunit III                       |                              |                     | <i>Streptomyces</i> / WP_030783240.1 (206)              | 100 / 100           |
| 15JA151_1_02778 | 270       | C-type cytochrome                                     |                              |                     | <i>Streptomyces eurythermus</i> / WP_189752509.1 (270)  | 100 / 100           |
| 15JA151_1_02777 | 352       | Rieske 2Fe-2S domain-containing protein               |                              |                     | <i>Streptomyces sp.</i> WELS2 / WP_181792970.1 (352)    | 99 / 100            |
| 15JA151_1_02776 | 545       | Ubiquinol-cytochrome c reductase cytochrome b subunit |                              |                     | <i>Streptomyces achromogenes</i> / WP_030621189.1 (545) | 97 / 96             |
| 15JA151_1_02775 | 417       | Cytochrome P450                                       | nzsA / ALL53314.1 (418)      | 65 / 79             | <i>Streptomyces eurythermus</i> / WP_189752507.1 (417)  | 99 / 99             |
| 15JA151_1_02774 | 190       | IPP isomerase                                         | nzsC / ALL53316.1 (185)      | 75 / 81             | <i>Streptomyces</i> / WP_030783251.1 (189)              | 99 / 98             |
| 15JA151_1_02773 | 325       | aminotransferase                                      | nzsD / ALL53317.1 (325)      | 64 / 74             | <i>Streptomyces</i> / WP_051815689.1 (325)              | 97 / 98             |
| 15JA151_1_02772 | 79        | ACP                                                   | nzsE / ALL53318.1 (80)       | 65 / 77             | <i>Streptomyces</i> / WP_030783257.1 (79)               | 100 / 100           |

|                 |     |                                                       |                            |         |                                                                |          |
|-----------------|-----|-------------------------------------------------------|----------------------------|---------|----------------------------------------------------------------|----------|
| 15JA151_1_02771 | 336 | $\beta$ -ketosynthase III                             | nzsF / ALL53319.1<br>(337) | 78 / 83 | <i>Streptomyces achromogenes</i> /<br>WP_189996525.1 (336)     | 98 / 98  |
| 15JA151_1_02770 | 337 | Isoprenyl transferase                                 | nzsG / ALL53320.1<br>(371) | 64 / 81 | <i>Streptomyces</i> /<br>WP_030783263.1 (337)                  | 98 / 98  |
| 15JA151_1_02769 | 592 | Acetolactate synthase                                 | nzsH / ALL53321.1<br>(593) | 76 / 82 | <i>Streptomyces achromogenes</i> /<br>WP_189996527.1 (592)     | 97 / 98  |
| 15JA151_1_02768 | 226 | Cyclase/aromatase                                     | nzsI / ALL53322.1<br>(227) | 80 / 89 | <i>Streptomyces</i> /<br>WP_030783270.1 (230)                  | 99 / 100 |
| 15JA151_1_02767 | 331 | $\beta$ -ketosynthase III                             | nzsJ / ALL53323.1<br>(331) | 73 / 83 | <i>Streptomyces</i> sp. WELS2 /<br>WP_181792983.1 (349)        | 97 / 99  |
| 15JA151_1_02766 | 355 | Rieske 2Fe-2S domain-<br>containing<br>protein        |                            |         | <i>Streptomyces</i> sp. DSM 40868<br>/<br>WP_167512969.1 (355) | 98 / 98  |
| 15JA151_1_02765 | 551 | Cytochrome b N-terminal<br>domain-containing protein  |                            |         | <i>Streptomyces eurythermus</i> /<br>WP_189752499.1 (551)      | 97 / 99  |
| 15JA151_1_02764 | 354 | Tryptophan biosynthesis                               | nzsB / ALL53315.1<br>(355) | 76 / 87 | <i>Streptomyces</i> /<br>WP_030783280.1 (354)                  | 99 / 99  |
| 15JA151_1_02763 | 453 | Aminotransferase class V-fold<br>PLP-dependent enzyme |                            |         | <i>Streptomyces achromogenes</i> /<br>WP_189996532.1 (453)     | 99 / 99  |

---

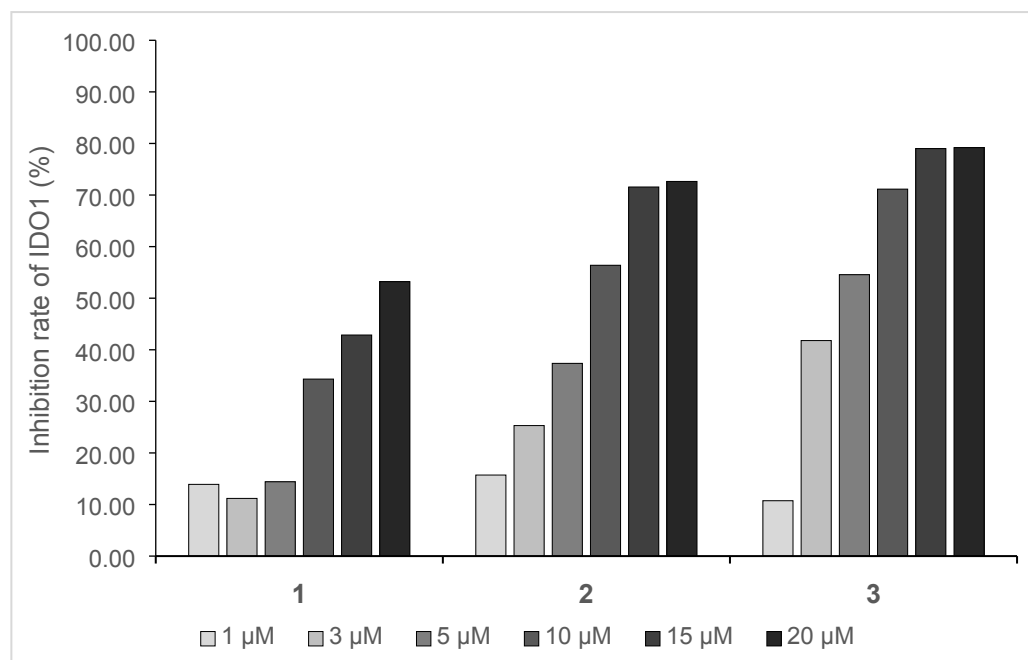

**Fig. S39.** IDO1 inhibition rate of jeju carbazoles A-C

**Table S2.** Docking scores of compounds **1-3** against holo-IDO1 enzyme (PDB id: 6AZU) with/without heme and apo-IDO1 enzyme (PDB id: 6AZV)

|                   | Docking Score (Kcal/mol)     |                                 |                |
|-------------------|------------------------------|---------------------------------|----------------|
|                   | 6AZU(holo-IDO1)<br>with heme | 6AZU(holo-IDO1)<br>without heme | 6AZV(apo-IDO1) |
| Compound <b>1</b> | -8.2                         | -8.4                            | -8.1           |
| Compound <b>2</b> | -7.3                         | -7.7                            | -8.3           |
| Compound <b>3</b> | -7.9                         | -8.3                            | -9.1           |

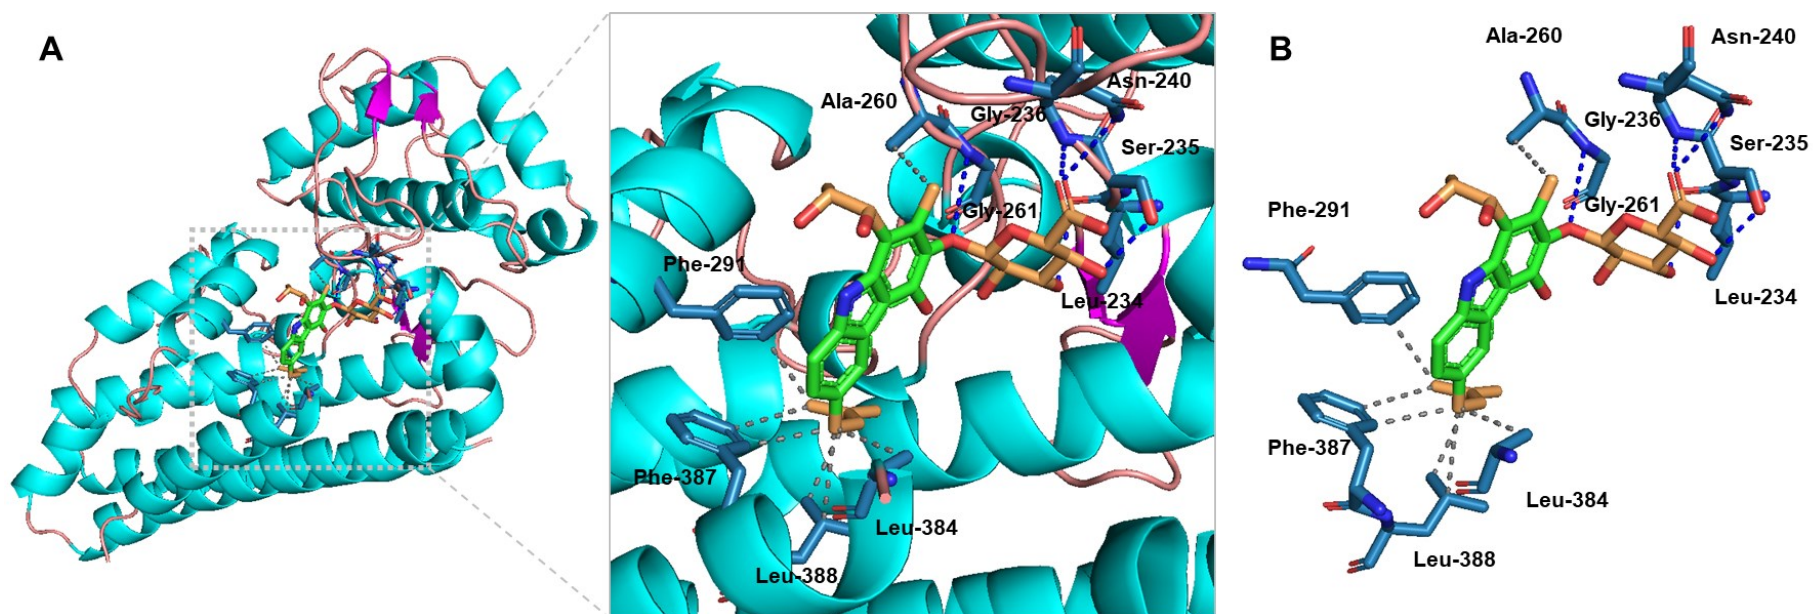

**Fig. S40.** Molecular-docking analysis of compound **1** with the apo-IDO1 enzyme (PDB id: 6AZV). (A) Putative binding mode for compound **1** with apo-IDO1. (B) Protein-ligand interaction profile between compound **1** with apo-IDO1. The gray dashed lines represent hydrophobic interactions; the blue dashed lines represent hydrogen bonds.

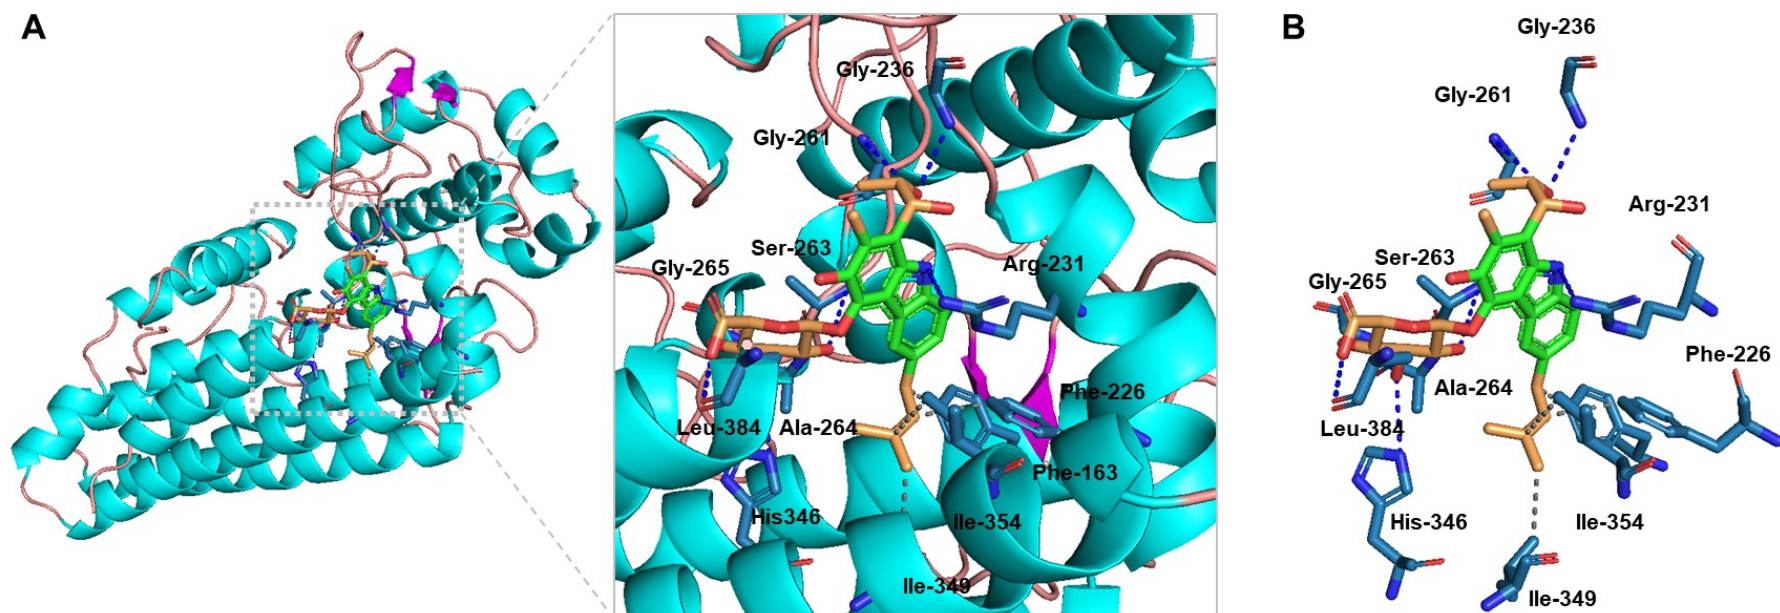

**Fig. S41.** Molecular-docking analysis of compound **2** with the apo-IDO1 enzyme (PDB id: 6AZV). (A) Putative binding mode for compound **2** with apo-IDO1. (B) Protein-ligand interaction profile between compound **2** with apo-IDO1. The gray dashed lines represent hydrophobic interactions; the blue dashed lines represent hydrogen bonds.
